# Supplementary material for: Multi-omic analysis of Huntington’s disease reveals a compensatory astrocyte state
Source: PubMed Central journal article supplement — Nat Commun. 2024 Aug 8;15:6742. doi: 10.1038/s41467-024-50626-0 (PMC11306246; doi:10.1038/s41467-024-50626-0), 2024-08-08
Supplement: 41467_2024_50626_MOESM1_ESM.pdf [file 41467_2024_50626_MOESM1_ESM.pdf]

## 1 Supplemental results

### 3 Weighted gene correlation network analysis reveals loss of preservation and 4 connectivity of glial and immune modules

5 We clustered the bulk RNAseq samples as a preliminary analysis to uncover the  
6 main factors that drive gene variation in our dataset. Clustering of the samples based on  
7 a distance metric calculated from normalized gene expression identified 6 clusters, some  
8 with predominance of cortical samples (C13 and C15), striatal samples (C12, C14, C16),  
9 control samples (C13-4), or HD samples (C12 and C16 – **Figure S1B**). Clusters C12 and  
10 C14 were enriched in samples from females and males, respectively. These results show  
11 a strong influence of brain region and condition on gene expression, as expected.

12 To understand patterns of gene co-regulation and dysregulation in HD brain  
13 regions, we performed weighted gene correlation network analysis (WGCNA) on control  
14 and HD bulk RNAseq samples. Networks from control and HD samples were constructed  
15 separately to examine the changes in the patterns of gene correlation in HD (**Figure S2A**)  
16 as described in the Methods. Gene-module memberships are provided in Supplementary  
17 Table 3. 22 and 20 modules were identified in the control and HD networks, respectively  
18 (**Figure S2A**). Multiple control modules exhibited gene overlap with HD modules,  
19 however, some HD gene modules showed minimal overlap with control modules. For  
20 instance, the HD purple and turquoise modules only significantly overlapped with the  
21 control grey (background) module (**Figure S2B**) - suggesting that some genes in HD gain  
22 correlation. We next correlated the genes in the control and HD modules to anatomic  
23 region, sex, age, and CAG repeat length (in HD modules) and found that there were  
24 several control modules with significant, strong, positive and negative correlations with  
25 anatomic regions (**Figure S2C**), and CAG repeat length (in HD modules). In particular,  
26 the HD purple module (which did not exhibit significant overlap with control modules) and  
27 the lightgreen module were significantly positively correlated with CAG repeat length, and  
28 the black, blue, turquoise, and lightcyan were significantly negatively correlated with CAG  
29 repeat lengths. The royalblue and turquoise showed no significant trait correlations  
30 (**Figure S2C**), which suggests they correspond to regional-agnostic gene programs.

31  
32 Examination of preservation statistics reveals that several modules showed  
33 minimal preservation overall, and in particular, loss of density and connectivity (**Figure**  
34 **S2D** and **Supplementary Table-3**). The loss of connectivity of select modules is shown  
35 in **Figure S2G**. These modules include the lightgreen, darkred, pink, tan, lightyellow, and  
36 royalblue. The lightgreen and royalblue modules were positively correlated with the  
37 caudate region, whereas the darkred, pink and tan modules were negatively correlated.  
38 In fact, the darkred displayed a correlation with the cingulate region, and the tan module  
39 showed correlations with cingulate and accumbens regions. Examination of gene  
40 ontologies enriched in the module genes of the most poorly preserved modules

41 incriminate splicing, DNA repair, mitosis, transcription, nuclear export, metabolism,  
42 response to iron ions, and dopamine metabolism (**Figure S2E** and **Supplementary**  
43 **Table-3**). Next, we examined the GO terms that are enriched in the HD modules that were  
44 significantly positively correlated with CAG repeat length – including the lightgreen and  
45 purple. The results incriminate enrichment of genes involved in immune response, T cell  
46 function, translation, proteosomal function, polyubiquitination, glial function, and response  
47 to stress. Of the genes enriched in the modules negatively correlated with CAG repeat  
48 length, our results showed enrichment of genes involved with vascular function and  
49 angiogenesis (lightcyan), DNA related ontologies like base-excision repair and  
50 methylation (blue), immune-related ontologies like regulation of T-cell activation (midnight  
51 blue), and response to unfolded protein, RNA splicing, cell aging, and myeloid cell  
52 homeostasis (black - **Figure S2F** and **Supplementary Table-3**). Given the involvement  
53 of immune genes in modules poorly preserved in HD, we asked if modules associated  
54 with immune (T-cell/microglial) and astroglial module genes display altered connectivity.  
55 We focused on the control modules with interesting microglial (*TSPO*) and astrocytic  
56 (*HEPACAM*) hubs - the black and brown, respectively (**Supplementary table-3**). Similar  
57 to poorly preserved modules (lightgreen, lightcyan, darkred, tan, pink), hub genes in the  
58 control black (immune) and brown (astroglial/immune) modules showed loss of  
59 connectivity of the hub genes, which appear to be members of other modules in the HD  
60 network (**Figure S2G**). Together, these results confirm that HD indeed significantly  
61 influences astrocyte and microglial gene expression.

## 62 Astrocytes in the caudate nucleus appear dysmorphic

63 The morphology of astrocytes immune-stained with GFAP appeared different  
64 compared with controls. HD astrocytes were dysmorphic with reduced process length. To  
65 quantify this phenotype, we measured the average process length of GFAP+ astrocytes  
66 in the caudate from three HD and three controls. The results showed a reduction in  
67 average process length in HD (**Figure S4C**).

## 68 Abundance Analysis in Astrocytes

69 In order to evaluate whether astrocytic clusters were enriched or depleted in HD,  
70 we conducted differential abundance analysis. As can be seen in **Figure S5F**, cluster F2  
71 was enriched in HD. Differential abundance analysis confirmed that this cluster was  
72 particularly enriched in HD in the accumbens (logFC 1.49, p value 0.00082), and a similar  
73 pattern was seen in the cingulate, though lacking significance (logFC 0.474, p value  
74 0.2105). This further supports our data suggesting that cluster F2 is enriched in HD in the  
75 accumbens (**Table S5**). When examining cluster F1 which showed enrichment of the  
76 neuroprotective geneset (**Figure 4B**), the differential abundance results showed that it  
77 was enriched in the cingulate cortex (**Figure S5G**). However, we did not find significant  
78 differences in F1 abundance between HD and controls (**Table S5**).

79

80 Differentially expressed genes in neurons

81 We performed differential gene expression analysis on major neuronal cell types  
82 detected in the striatal and cortical regions of our study. Volcano plots displaying top  
83 DEGs for each cell type in all three brain regions are displayed in **Figure S7A-C**. The  
84 differential gene expression analysis of neurons revealed that the overall numbers of  
85 DEGs were significantly larger in the striatal region than the cortex (**Figure S7D**). We saw  
86 some of the highest numbers of DEGs in the SPN cells with the accumbens dSPN having  
87 the largest number of DEGs decreased and the highest upregulation coming from the  
88 caudate dSPN. In the cingulate cortex, the glutamatergic neurons had significantly more  
89 DEGs compared to the GABAergic neurons and the number of DEGs from the GABAergic  
90 neurons were significantly lower compared to the striatal regions. The DEGs are provided  
91 in **Supplementary Table 8**.

92 Further examination of the DEGs showed the expected decrements of *PCP4* and  
93 *PDE10A* in all SPNs in the caudate and accumbens (**Supplementary Table-8**). In dSPNs  
94 of both regions, we found the expression of *PENK* to be increased. Changes in these  
95 genes have been documented by multiple studies<sup>1-3</sup>. Moreover, the caudate dSPN  
96 showed a significant decrease in the expression of *TAC1*, but this was not found to be  
97 significant in the accumbens. Among the set of genes that were shared and  
98 downregulated between SPNs across the two regions were *MALAT1*, *FTX*, *RBFOX1*,  
99 *RYR3*, and *RYR2*. Interestingly, we observed that the expression of *CLU* to be increased  
100 in dSPN and iSPN neurons in the accumbens and caudate along with a significant  
101 increase in accumbens GABAergic cells as well.

102 We compared our DEG results from the caudate to Lee et al.<sup>4</sup> SPN DEG. We found  
103 291 genes in common among dSPN in the caudate that were upregulated in our analysis  
104 and 251 genes that were downregulated (**Supplementary Table 8**). Many of the genes  
105 that were upregulated were involved in heat shock protein response. More specifically,  
106 these genes included *HSB1*, *HSPA4*, *HSPA8*, *HSPA1A*, and *CLU*. Genes that were  
107 downregulated in dSPN included *SLC24A2*, *RYR3*, *CACNA1A*, *JPH4*, and *CALM1* which  
108 are known to be involved in calcium ion activity. Comparing the iSPN neurons to the Lee  
109 et al. findings revealed there were 210 shared genes that were upregulated and 327  
110 shared genes that were downregulated. Many of the shared genes that were upregulated  
111 were similar to the dSPN like *HSPA1A*, *CLU*, and *DNAJA1*. Among the upregulated  
112 genes, a large portion of it were involved in binding to unfolded proteins. In addition, we  
113 examined the medium spiny neuron DEG from Malaiya et al.<sup>4</sup> and confirmed that many of  
114 the genes reported to be downregulated across all SPN subtypes were indeed  
115 downregulated in dSPN and iSPN in the striatal brain regions of our data too. These  
116 genes include *PDE10A*, *PDE1B*, *ADCY5*, *ATP2B1*, and *ARRP21*. Shared upregulated  
117 genes in the iSPN are largely involved in response to unfolded protein which are driven  
118 by heat shock protein genes. On the other hand, some shared downregulated genes in  
119 the iSPN were involved with disruption of ion channel activity as driven by the decreased  
120 expression of genes like *GRIN2A*, *GRIA1*, *GRIN2B*, *NLGN1*, *DAPK1*, *DLG1*, and *DLG2*.

121 We also compared our GO terms to Lee et al. and found that our results are  
122 consistent with the decrease of phosphatidylinositol signaling system in accumbens  
123 dSPN and iSPN as well as in the caudate dSPN but not caudate iSPN. MAPK signaling  
124 was only found to be increased among accumbens dSPN. Conversely, the GO term  
125 cholinergic synapse was increased in Lee et al. but decreased in all of our SPN in  
126 accumbens and caudate. Spliceosome activity also was decreased as expected among  
127 all SPN in all regions. These differences may arise from differences in the regions  
128 analyzed in Lee et al, which included the putamen – a region not included in our analysis.  
129 In addition to these comparisons, we also report genes involved in various ion channel  
130 activity as well as lipid phosphorylation to be depleted in all SPN in both the accumbens  
131 and caudate (**Figure S7E**). There were differences and similarities between the caudate  
132 and accumbens SPNs, and between iSPNs and dSPNs. For example, dendrite  
133 morphogenesis GO was increased in accumbens SPN but decreased in the caudate,  
134 while glutamatergic receptor activity GO term was significantly enriched in decreased  
135 genes in both groups and both regions. Conversely, the GO lipoprotein particle receptor  
136 binding was only enriched in increased DEGs in the accumbens dSPNs. Also, GABA  
137 neurons showed fewer DEGs than other neuronal types, and even these were regionally  
138 diverse, being mildest in the cingulate cortex (**Figure S7D**). Among the cingulate neurons,  
139 we observe a general decrease in genes related to metabolism in the glutamatergic and  
140 GABAergic neurons.

#### 141 Other astrocytic proteins

142 Next, we turned our attention to other markers of the putative neuroprotective  
143 protoplasmic clusters P1 and P3 (**Figure 4D**). *CLU* was expressed in both clusters and  
144 thus quantified it in the cingulate cortex and caudate nucleus. Quantification of *CLU* by  
145 immunostaining showed that it was decreased in the cingulate but not in the caudate  
146 HD astrocytes (**Figure S8A-D**). Overall, these results show that even within the same  
147 cluster, astrocytes can show different patterns of protein expression. Thus, putative  
148 neuroprotective astrocytes in the cingulate are different from those in the caudate  
149 nucleus; they increase metallothioneins and decrease *CLU*, while caudate astrocytes of  
150 the same cluster did not exhibit altered expression of *CLU*, and even showed decreased  
151 levels of MT3.

152 We asked if *CLU* overexpression alters expression levels of metallothioneins  
153 (**Figure S9B-C**). In *CLU*-overexpressing astrocytes there was a modest upregulation of  
154 *CLU*, but no increase in metallothionein 1 genes (**Figure S9B-C**). Additional studies are  
155 needed to elaborate on the relationship between *CLU* and MT's in astrocytes.

#### 156 Astrocyte-Microglia crosstalk in HD

157 Given the known crosstalk between astrocytes and microglia<sup>5</sup>, we asked if microglial gene  
158 expression is altered in HD brains. Notwithstanding the limitations of snRNAseq in  
159 analyzing microglial cells<sup>6</sup>, and the relative paucity of retrieved cells, we performed  
160 analysis on HD and control myeloid cells in our cohort. We first subclustered our myeloid  
161 cells from the three brain regions analyzed. We discovered 3 major clusters which  
162 corresponded to microglial cells, blood-derived myeloid cells (monocyte-derived



163 macrophages), and T-cells (**Figure S10A**). This is further illustrated by examining gene  
164 marker expression, which shows *SORL1* and *DOCK4* in microglia, *CD163* in monocyte-  
165 like cells, and *CD96* as well as *THEMIS* in T-cells (**Figure S10B** and **Supplementary**  
166 **Table-9**). Since the number of macrophages and T-cells were considerably than  
167 microglial cells (**Supplementary Table-9**), we decided to focus on the latter for  
168 downstream analysis. Microglial cells were distributed across all brain regions examined,  
169 unlike T-cells and macrophages, which we mainly retrieved from HD striatal samples  
170 (**Supplementary Table-9**). To understand how the microglia differ across the three brain  
171 regions in HD, we performed DEG analysis in each of the regions (**Figure S10C-E**).  
172 Interestingly, heat shock protein gene expression varied between the three brain regions  
173 in microglia. For example, *HSPH1* was increased in the accumbens and cingulate but  
174 downregulated in the caudate. In addition, several genes were downregulated in the  
175 caudate, like *HSPA1A*, *HSPA1B*, and *HSP90AA1*. Examining the GO enriched in  
176 microglial DEGs showed regional differences in microglial responses to HD (**Figure**  
177 **S10F**). As expected, cingulate and accumbens HD microglia upregulated genes involved  
178 in heat shock and stress response, but this was not the case in the caudate. Likewise, in  
179 the cingulate and accumbens, HD microglia upregulated genes associated with cell  
180 scavenger receptors, which are associated with the innate immune response and  
181 phagocytosis<sup>7</sup>.

182         Given the heterogeneity of gene expression changes in microglia in HD, and in  
183 light of our previous results on astrocyte phenotypic heterogeneity across brain regions  
184 in HD, we asked if region-enriched astrocytic phenotypes altered microglial function.  
185 Specifically, we examined if the neuroprotective astrocytic phenotype, with increased  
186 *MT3* expression, led to changes in microglial function. To address that question, we  
187 performed co-culture assays between microglia and astrocytes in a trans-well assay, and  
188 quantified gene expression in microglia using RNAseq or phagocytosis of fluorescent  
189 beads using FACS (**Figure S11A**). We overexpressed *MT3* and *CLU* (which were both  
190 markers of neuroprotective protoplasmic clusters 1 and 3), or GFP in astrocytes, and co-  
191 cultured with control microglia. We were interested in *CLU* because we previously  
192 reported that *CLU* was increased in astrocytes in the context of glioma microenvironment,  
193 and that *CLU*<sup>+</sup> astrocytes can alter gene expression of glioma cells in a manner that  
194 reduced expression of immune-related genes<sup>8</sup>. This experimental design allowed us to  
195 measure how changes in astrocyte phenotype influence microglial function via factors  
196 secreted into the media by astrocytes. Our results showed that co-culture of astrocytes  
197 with microglia significantly altered gene expression in microglia (**Figure S11B** – see PCA,  
198 and **Supplementary Table-9**). However, while *MT3* overexpression significantly altered  
199 gene expression in microglia (**Figure S11D**), that was not the case in microglia co-  
200 cultured with *CLU* overexpressing astrocytes (**Figure S11C**). GO enrichment analysis  
201 showed that *MT3*-astrocytes caused microglia to upregulate genes associated with lipid  
202 and fatty acid metabolism and transport (**Figure S11E**). That stated, we did not identify  
203 changes in pathways related to phagocytosis.

204           Given that microglial gene expression can be altered by MT3-astrocytes, we asked  
205 if the genes significantly increased or decreased in microglia *in vitro* by MT3 astrocytes  
206 (referred as MT3 DEG up and MT3 DEG down signatures) were enriched in the DEGs in  
207 HD vs control microglia (cluster 0) from our snRNAseq data across the three brain  
208 regions. We also measured the enrichment of genes positively and negatively correlated  
209 with CAG repeat length, because CAG-correlated genes were enriched in pathways  
210 related to immune functions (main text - **Figure 1F**). Moreover, we measured the  
211 enrichment of the GO term phagocytosis in the region-specific microglial DEGs because  
212 phagocytosis is a general signature for which functional assays are available to us  
213 (**Figure S11F**). We found that while the *in vitro* MT3 DEG up signature was significantly  
214 enriched in the snRNAseq microglial DEGs in cingulate and approached significance in  
215 the nucleus accumbens, the signature was not enriched in the caudate (**Figure S11F**).  
216 This finding was consistent with the fact that MTs were significantly increased in the  
217 cingulate and accumbens protoplasmic astrocytes (by snRNAseq and IHC validation for  
218 cingulate, snRNAseq for accumbens), but not in caudate astrocytes (by snRNAseq and  
219 IHC). Also, the term for phagocytosis was not enriched in the microglial DEGs – only in  
220 Cluster 0 (microglial cells) marker genes. In addition, genes positively correlated with  
221 CAG repeat length were enriched in accumbens microglial DEGs but not other regions.  
222 Together, these findings suggest that in addition to the neuroprotective and  
223 astroprotective roles of MTs, these proteins may alter microglial gene expression and  
224 functional attributes, and these effects may be region-specific.

225           Functionally, microglia co-cultured with MT3 but not CLU overexpressing  
226 astrocytes increased their phagocytic activity (**Figure S11G**). Of note, there is a  
227 discrepancy between increased phagocytosis quantified by FACS and the absence of  
228 accompanying gene expression changes in phagocytosis-related pathways. This may be  
229 explained by the fact that the percentage of microglial cells with increased phagocytosis  
230 was relatively low in our assay, thus, gene expression changes may not have been large  
231 enough to be detected by bulk RNAseq. It is also possible that the changes in  
232 phagocytosis induced by MT3 astrocytes occur on the protein level without durable gene  
233 expression changes in phagocytosis-related pathways. It remains to be determined,  
234 however, whether increased microglial phagocytic activity is compensatory or deleterious  
235 in HD. Additional studies are needed to define the potential functional effects of changes  
236 in phagocytosis and lipid metabolism in HD microglia.

237

238 **Figure S1. Bulk RNAseq samples and CAG repeats. Related to Figure 1. A)** t-  
239 distributed stochastic neighbor (tSNE) embedding of bulk RNAseq samples used in the  
240 study color-coded by sex (top), and sequencing batch (bottom) – showing adequate  
241 correction for batch- and sex- related effects. **B)** Sample distance heatmap showing the  
242 Manhattan distance clustered using the Ward D2 method. Normalized batch corrected  
243 counts were used to generate the sample distance. The colored bars on the left indicate  
244 the sample clusters, anatomic region (Acc: Accumbens. Caud: Caudate, Cing: Cingulate),  
245 and HD grade/Condition (Control (Con) versus HD grades 1-4 & J: juvenile onset HD). **C)**  
246 Differences in CAG Repeat length modal peaks measured in the specified brain regions  
247 or blood/cerebellum. Barplots of the difference in CAG repeats in each brain region  
248 (purple for accumbens, green for caudate, yellow for cingulate) compared to the  
249 blood/cerebellum. The x axis values represent the delta change compared to the  
250 blood/cerebellum. Positive values indicate higher values in the brain regions specified,  
251 and 0 indicates no change. The y axis shows the number of samples which are  
252 represented by the x axis value.

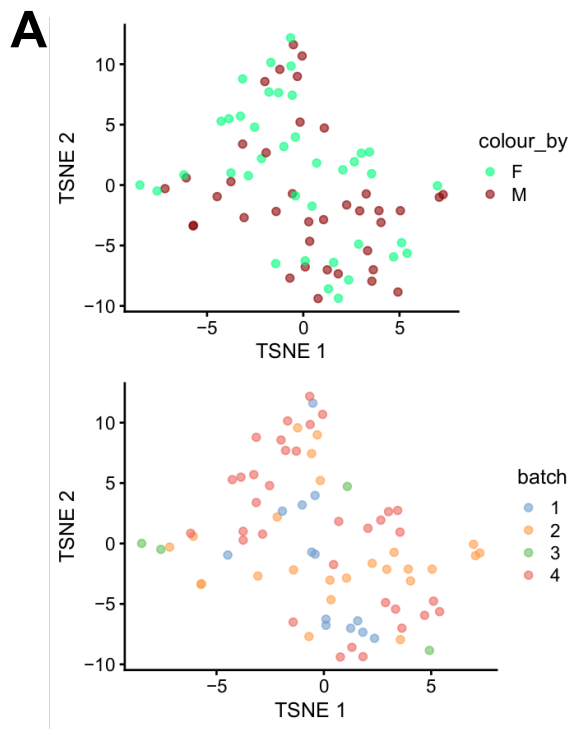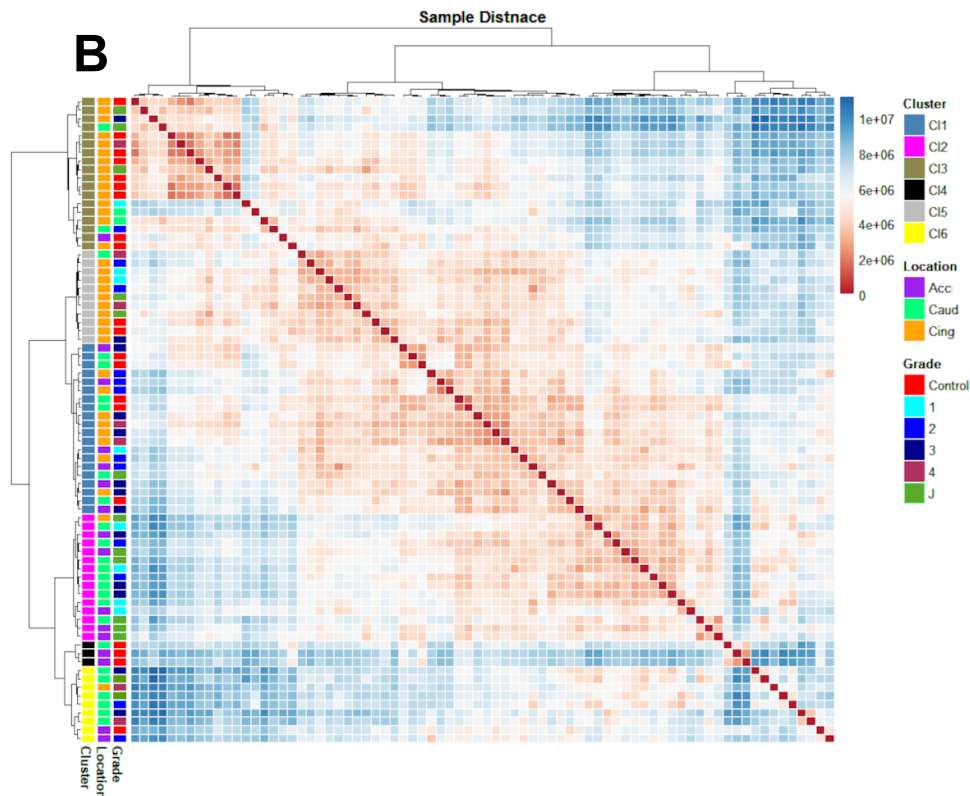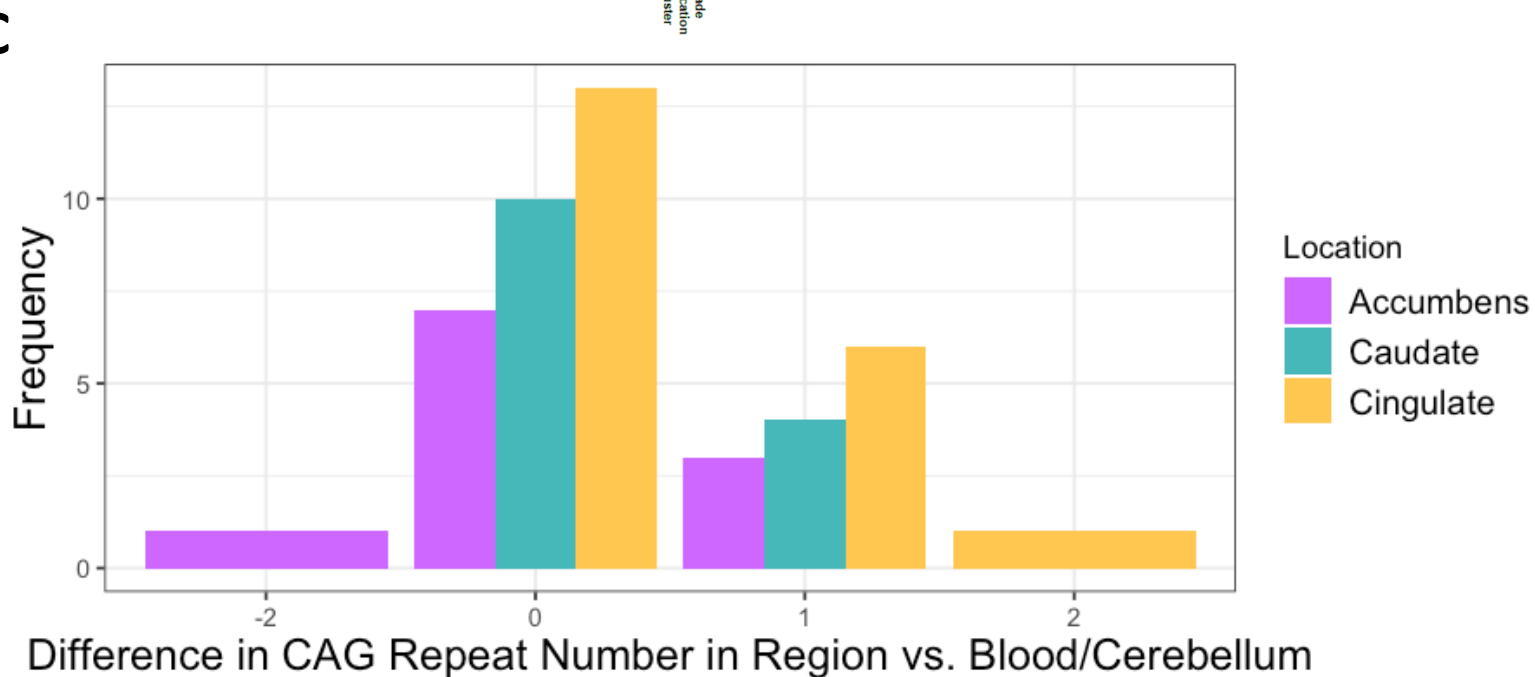

253 **Figure S2. Weighted gene correlation analysis (WGCNA) identifies gene modules**  
254 **that lose preservation in HD. A)** Dendrograms showing genes clustered hierarchically  
255 for control (right) and HD (left) samples. The genes are colored by control or HD network  
256 module designations in the colored bars (bottom) as specified, for control (left) and HD  
257 (right) dendrograms. **B)** Heatmap showing the overlap between genes in control modules  
258 (rows) and HD modules (columns). The number of overlapping genes and p values are  
259 indicated in the tiles. **C)** Heatmap of trait-module correlations for the Control (left) and HD  
260 (right) network modules. The correlation coefficients and p values in parenthesis are  
261 indicated. The module-trait relationships were determined in control and HD expression  
262 matrices, separately. **D)** Control module preservation statistics with module size (x-axis)  
263 plotted against several module density and connectivity statistics (y-axis). The top row  
264 shows the most frequently used summary statistics. The color of the nodes represents  
265 gene module membership in the control modules. **E-F)** Gene Ontology (GO) term  
266 enrichment analysis showing the top biological process GO terms enriched in the genes  
267 of select control (**E**) and HD (**F**) modules. The heatmap shows GO terms as rows, and  
268 module names as columns. The negative log<sub>10</sub> of the enrichment p value is represented  
269 by color. **G)** Subnetwork analysis of the top 25 genes with highest connectivity (hub  
270 genes) in the control modules shown in the control subnetwork (left) versus the HD  
271 subnetwork (right). Nodes represent genes and edges correlations. The edges with  
272 weights less than the mean weight for each subnetwork were trimmed. The size of the  
273 circles (gene) represents the hub score as detected in igraph package. The node color in  
274 the HD column (right) indicate the module membership of the respective gene in the HD  
275 network.

**A**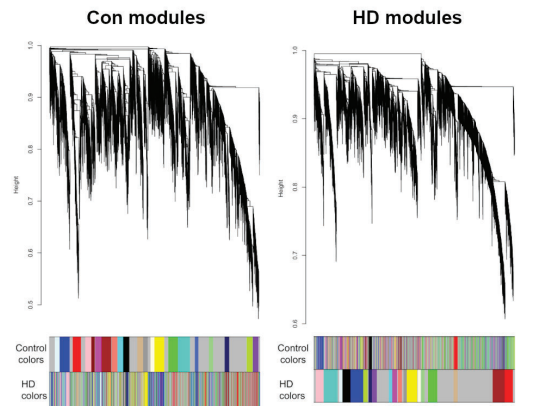**B**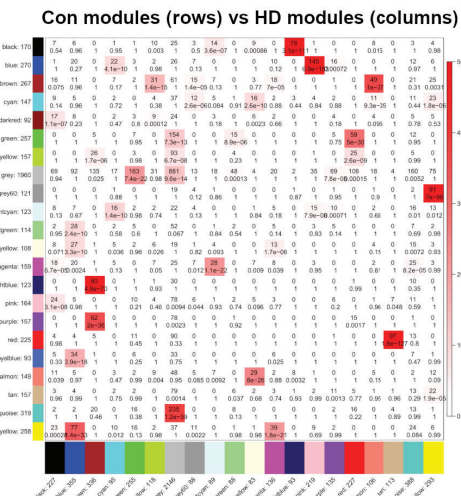**G****Con hub genes (left) in HD colors (right)**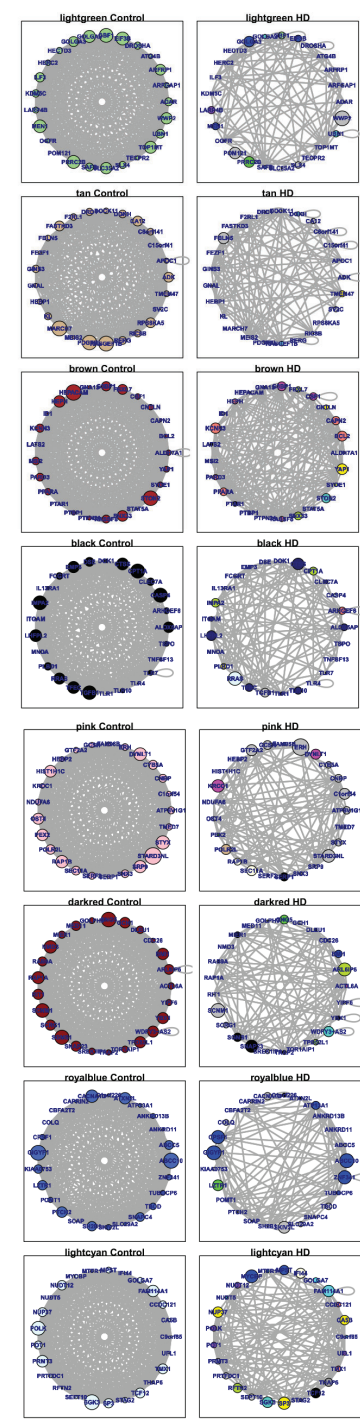**C**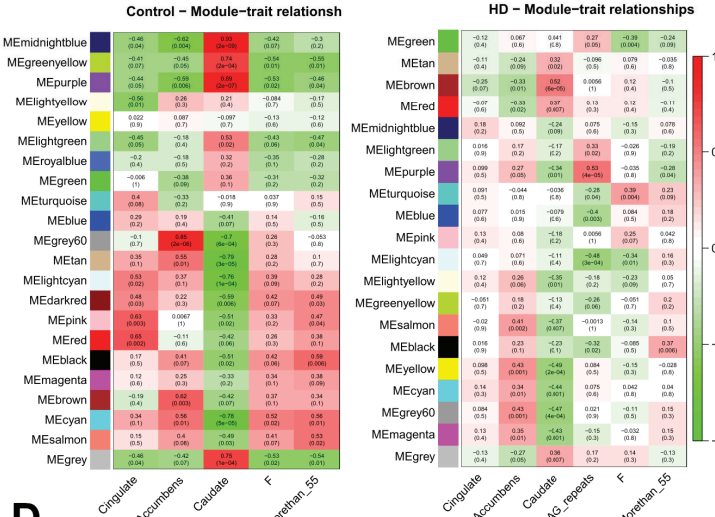**E**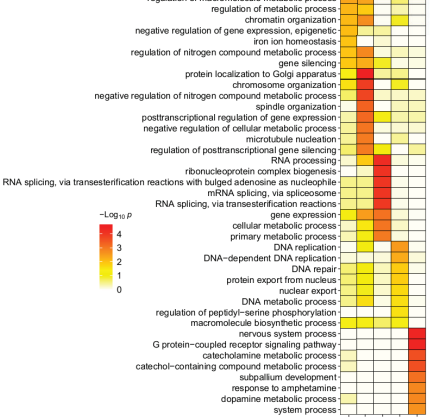**F**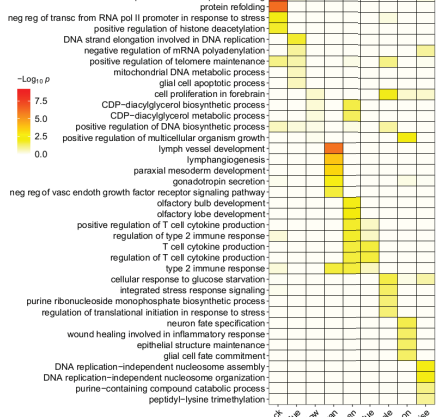**D**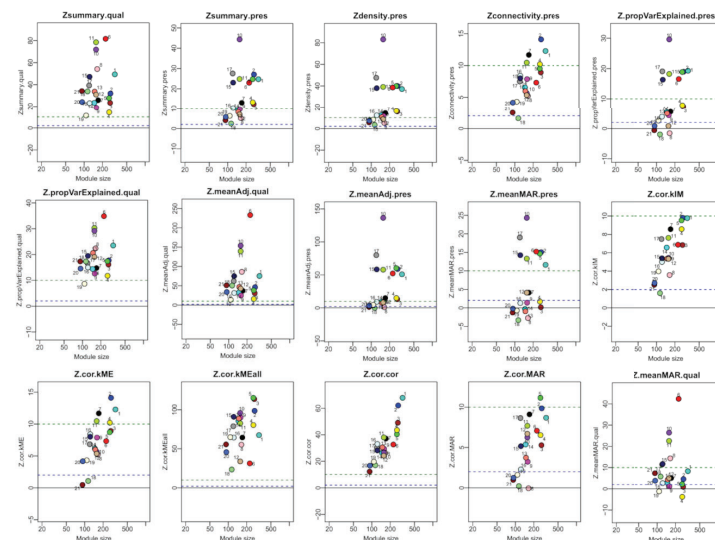

276 **Figure S3. Lipidomic analysis of HD brains. Related to Figure 2. A)** Boxplots of  
277 relative abundance of select long-chain lipid species with significant one-way ANOVA p-  
278 values for grade. The data is presented with grade (color-coded) on the x-axis. The p-  
279 values for Tuckey post-hoc comparisons are indicated in the table (down). Stars indicate  
280 significant post-hoc analysis p-values. P values are indicated in the table below figure.  
281 The boxplots indicate the median and Q1-3 interquartile range. Whiskers extend to the  
282 lowest and highest values from the first and third quartiles, respectively, up to 1.5 times  
283 the interquartile range in either direction. Outliers are denoted by points. **B)** Receiver  
284 Operating Characteristic (ROC) curve showing the sensitivity (y-axis) and 100-specificity  
285 (x-axis) of the sPLS-DA model in distinguishing condition (grade) based on the first 4  
286 components. ROC traces for each grade are represented separately and denoted using  
287 the colors indicated on the right. **C)** Scatter plots showing projection of lipidomics samples  
288 and integrated lipidomic/RNAseq in the first two latent variables of sPLS. The variance  
289 explained by each component is indicated on the axes. The samples are color- and  
290 shape- coded by sex. **D)** Correlation network analysis showing the correlation (encoded  
291 by edges, with color corresponding to correlation values) between genes and lipid species  
292 (nodes). Only the most highly (positively and significantly) correlated nodes are shown.  
293 The color of the edges represent the correlation value.



**A**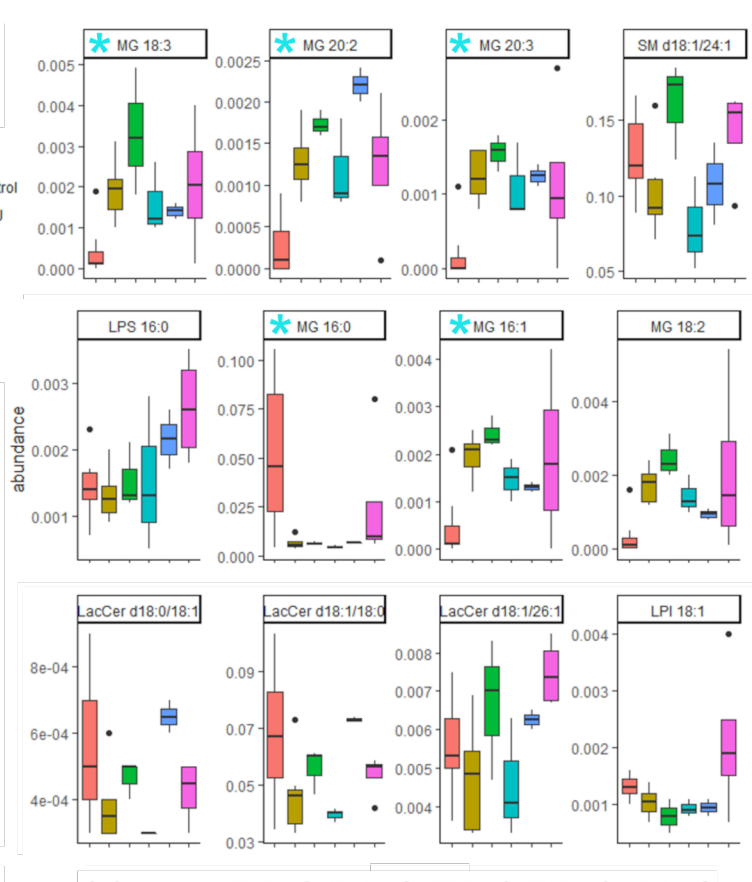

| lipid             | HDJ.Control      | HD1.Control      | HD2.Control | HD3.Control      | HD4.Control      |
|-------------------|------------------|------------------|-------------|------------------|------------------|
| MG 16:0           | <b>0.0210008</b> | 0.1292716        | 0.1052063   | 0.2544323        | 0.5765550        |
| MG 16:1           | <b>0.0305467</b> | <b>0.0350648</b> | 0.5703944   | 0.8382855        | 0.1108342        |
| MG 18:2           | 0.1199753        | 0.0597440        | 0.6305894   | 0.9731304        | 0.1023397        |
| MG 18:3           | <b>0.0859118</b> | <b>0.0052513</b> | 0.5502678   | 0.8277141        | 0.1460213        |
| MG 20:2           | <b>0.0047812</b> | <b>0.0022329</b> | 0.1023767   | <b>0.0005450</b> | <b>0.0388220</b> |
| MG 20:3           | <b>0.0140766</b> | <b>0.0171300</b> | 0.2050507   | 0.2016551        | 0.1014069        |
| SM d18:1/24:1     | 0.5345822        | 0.6133371        | 0.2121135   | 0.9569118        | 0.9765289        |
| LacCer d18:0/18:1 | 0.1645990        | 0.9322298        | 0.1256621   | 0.9589568        | 0.6641103        |
| LacCer d18:1/18:0 | 0.1063144        | 0.8637547        | 0.1262642   | 0.9980850        | 0.6741425        |
| LacCer d18:1/26:1 | 0.8136110        | 0.8313211        | 0.8750525   | 0.9864140        | 0.2381388        |
| LPI 18:1          | 0.9273928        | 0.7663751        | 0.9179075   | 0.9624464        | 0.2352996        |
| LPS 16:0          | 0.9959272        | 0.9999702        | 0.9999702   | 0.7257249        | 0.0622278        |

**B**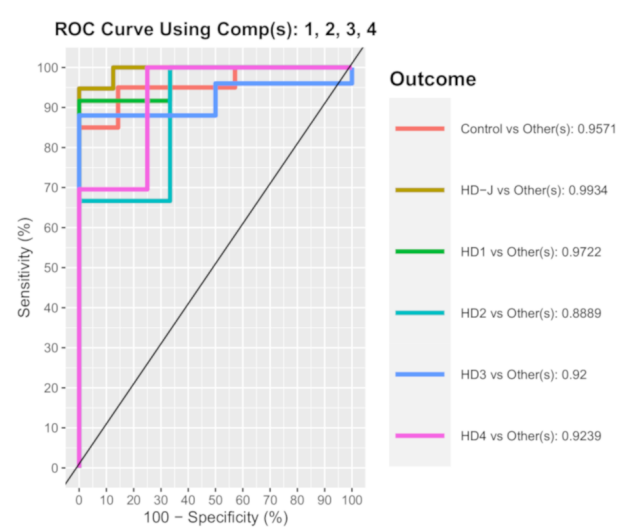**C**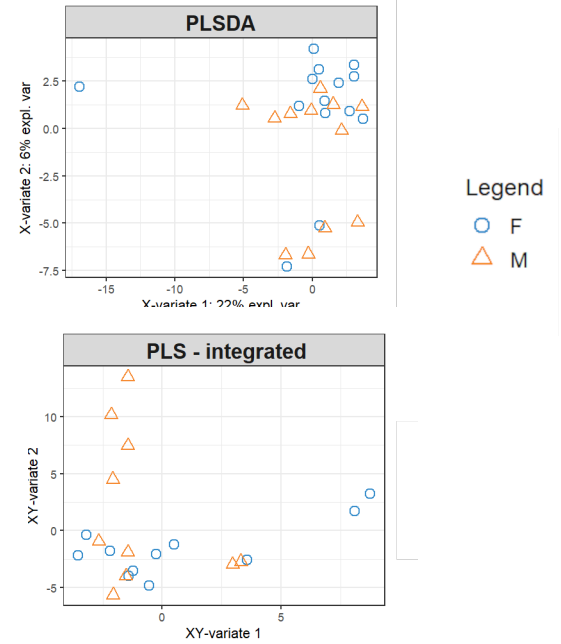**D**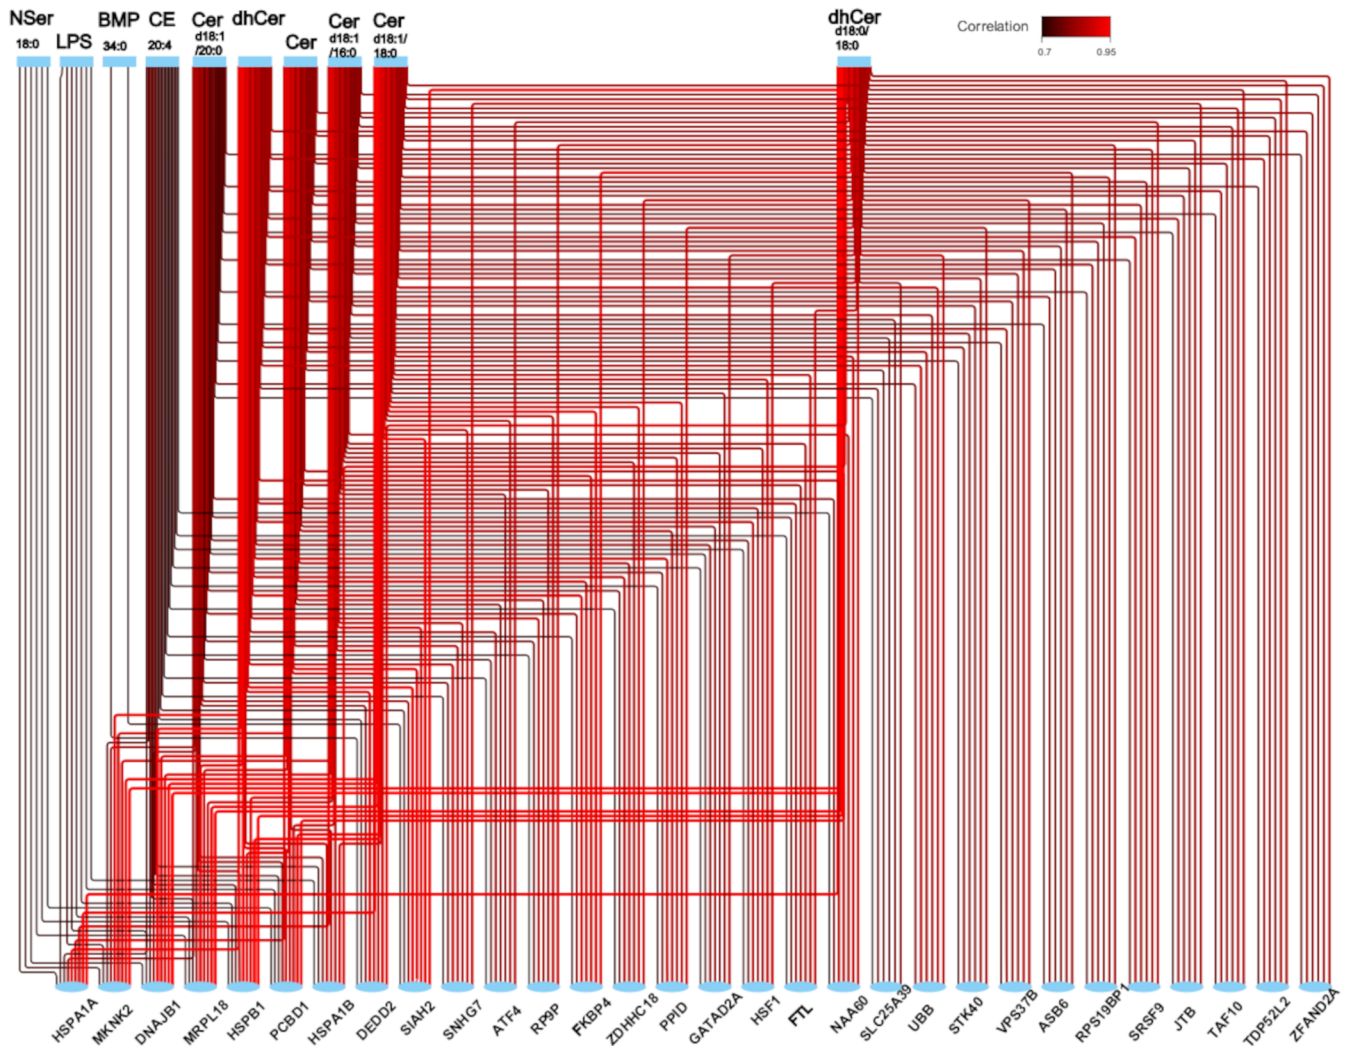



294 **Figure S4. Increased CD44 expression in the Caudate of HD astrocytes. A)**  
295 Immunofluorescent images depicting CD44 positive astrocytes (fibrous-like) (arrowhead)  
296 that are MT3 positive (arrow) in control and HD caudate nucleus. Scale Bar= 20  $\mu$ m. **B)**  
297 Quantification of the percent of astrocytes in the Caudate that are CD44 positive using a  
298 two-tailed unpaired t-test. N=6 for control and 7 for HD. Data is shown as mean +/- SEM.  
299 P value= 0.0050. **C)** Quantification of the average process length of astrocytes in Control  
300 and HD measured by the length of GFAP positive processes using a two-tailed unpaired  
301 t-test. N=3 per condition, minimum of 12 cells per case. Data is shown as mean +/- SEM.  
302 P value= 0.0013. **D)** Quantification of the density of CD44 and MT3 positive astrocytes in  
303 the Caudate using a two-tailed unpaired t-test. N=6 for control and 7 for HD. Data is  
304 shown as mean +/- SEM. P value= 0.2548. **E)** Quantification of the density of CD44  
305 negative (protoplasmic) and MT3 positive astrocytes in the Caudate using a two-tailed  
306 unpaired t-test. N=6 for control and 7 for HD. Data is shown as mean +/- SEM. P value=  
307 0.0021. **F)** Immunohistochemical stain for CD44 in the caudate of control and HD  
308 samples. Note the labeling of pencil fibers and ventricle lining seen at the top of the image.  
309 The arrow indicates a CD44 positive cell in the caudate parenchyma not associated with  
310 large vessels or pencil fibers. Scale bar= 250 $\mu$ m. Insets – bottom row: Enlarged images  
311 of the regions shown in the black box showing the parenchymal CD44 positive cell in the  
312 top right corner of the HD image. Scale bar=100 $\mu$ m.

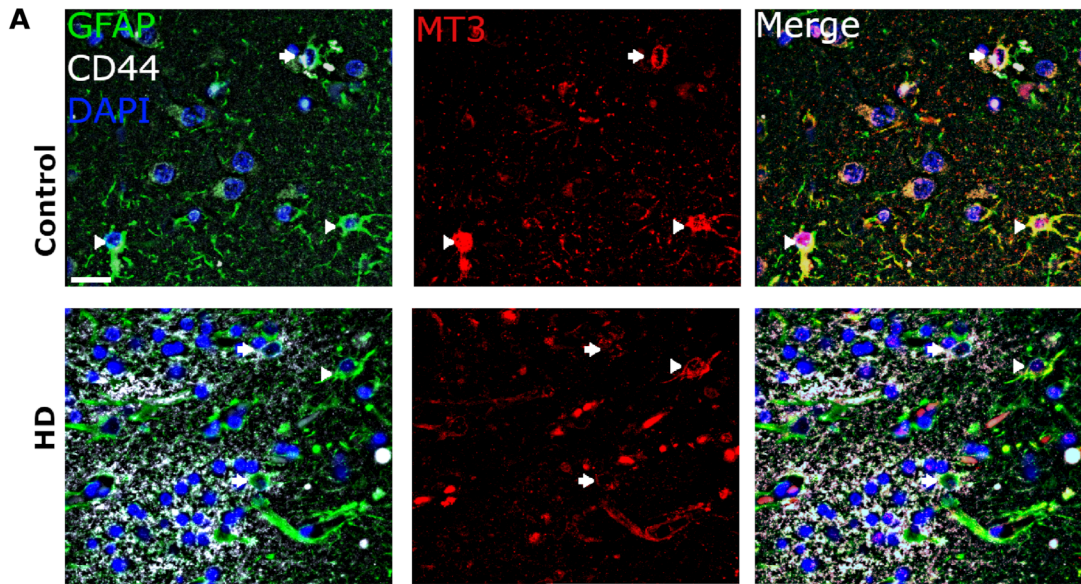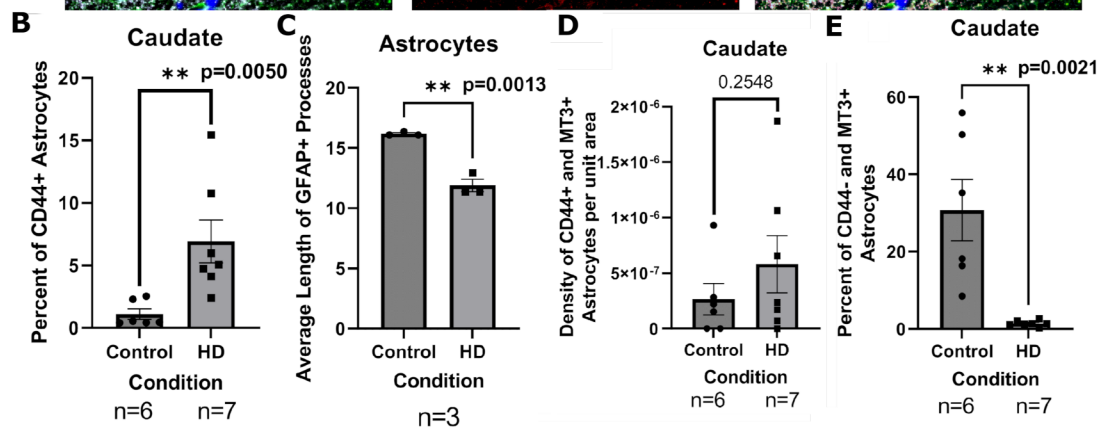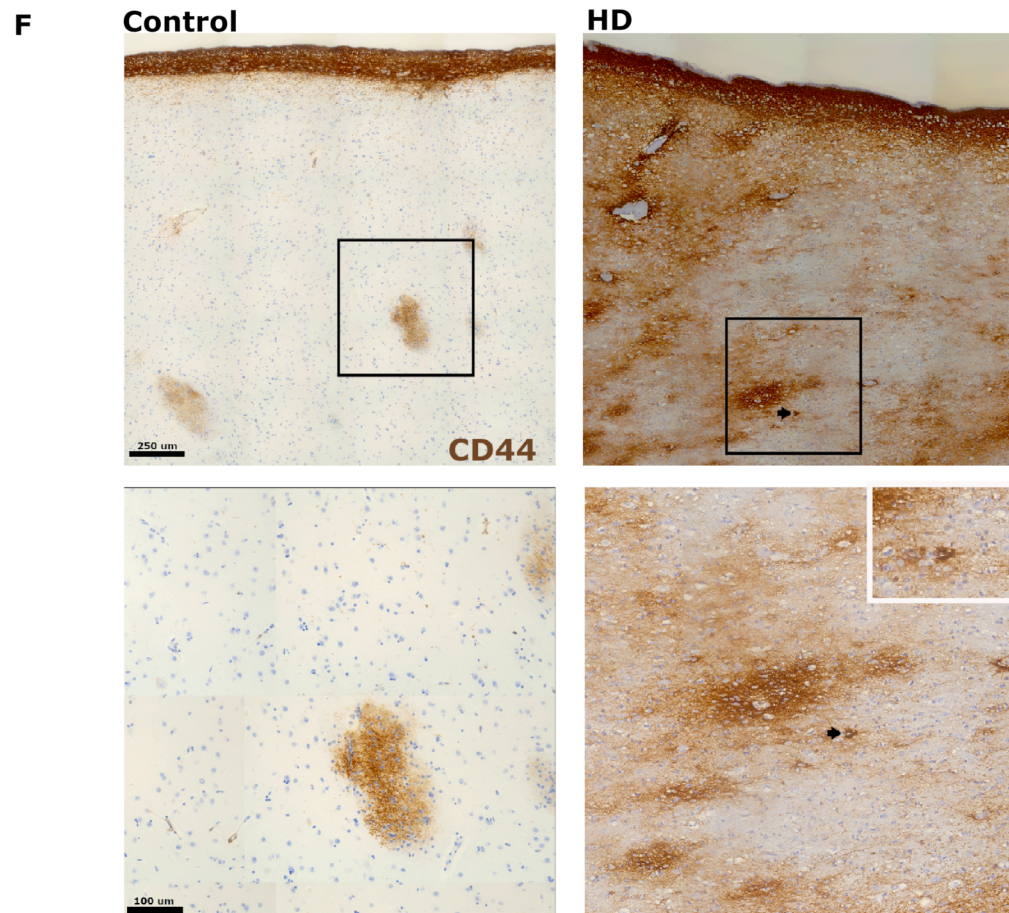

313 **Figure S5. Astrocyte clusters and pseudotime analysis - related to Figure 3. A)** t-  
314 SNE plots of all snRNAseq cells color-coded by donor (left), grade (middle), and  
315 sequencing batch (right). **B)** UMAP plots of all astrocytes split by condition (left - control  
316 and the right - HD), color-coded by clusters. **C)** Dot plot showing the expression of the  
317 top five cluster markers for the clusters in **(B)**. **D)** PHATE embeddings of all astrocytes  
318 with color-coded by pseudotime values in trajectory-1 (left) and trajectory-2 (right). High  
319 pseudotime values are shown in red, low in yellow. Arrows denote areas of high SLC1A2  
320 expression (left) and high CD44 expression (right). The ridge plots (below) show  
321 frequency of grade (y axis) across pseudotime values (x axis). **E)** Heatmap showing gene  
322 ontology enrichment analysis for the genes that vary along pseudotime trajectories from  
323 high pseudotime values to low values as - shown in (D). The  $-\log_{10}$  p value of enrichment  
324 of select pathways (y axis - rows) in each trajectory (x axis - columns) are coded by color.  
325 **F)** Barplots depicting the proportion of each protoplasmic (top) and each fibrous-like  
326 (bottom) astrocyte sub-cluster cells per donor. The plots are separated by control (left)  
327 and HD (right) donors. **G)** Barplots showing the proportion of each fibrous-like (top) and  
328 protoplasmic (bottom) astrocyte sub-cluster cells per HD grade/condition split by  
329 anatomic region (left – accumbens; center – caudate; right – cingulate).

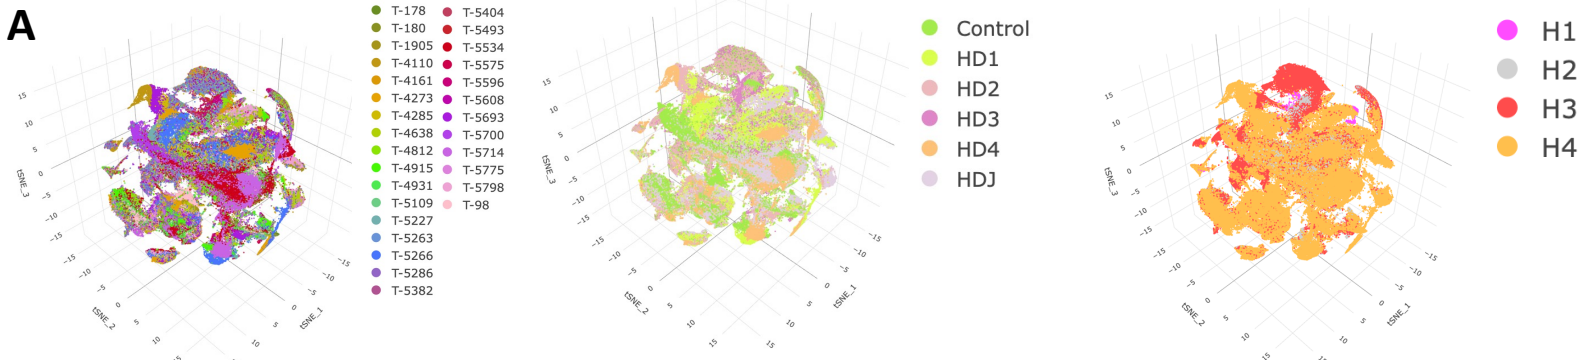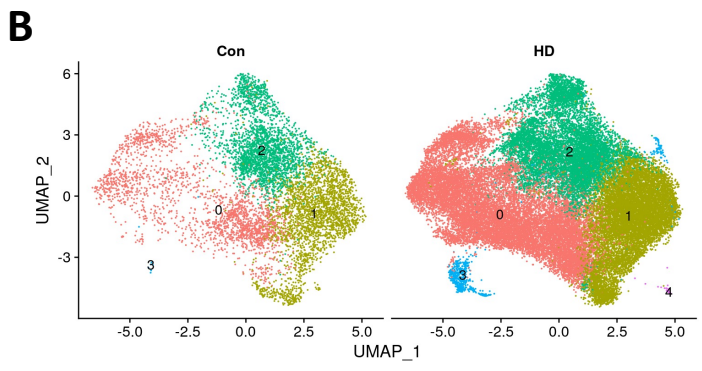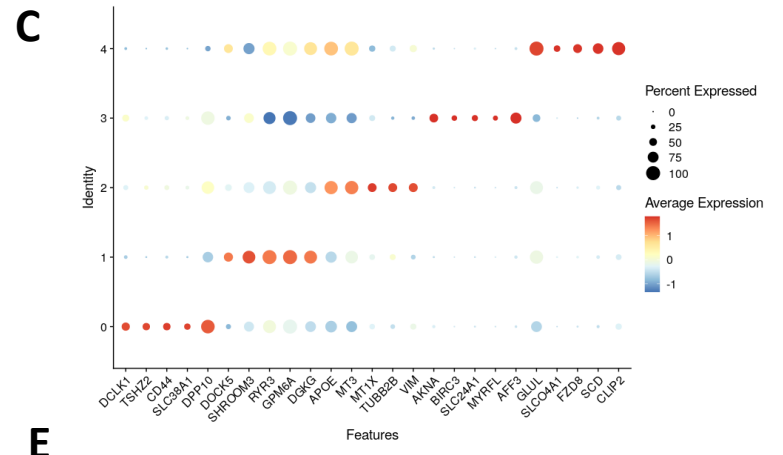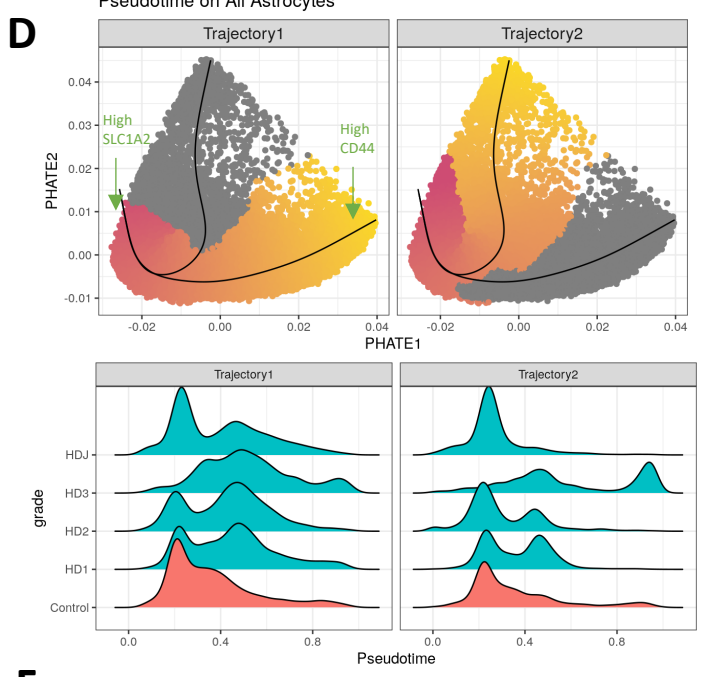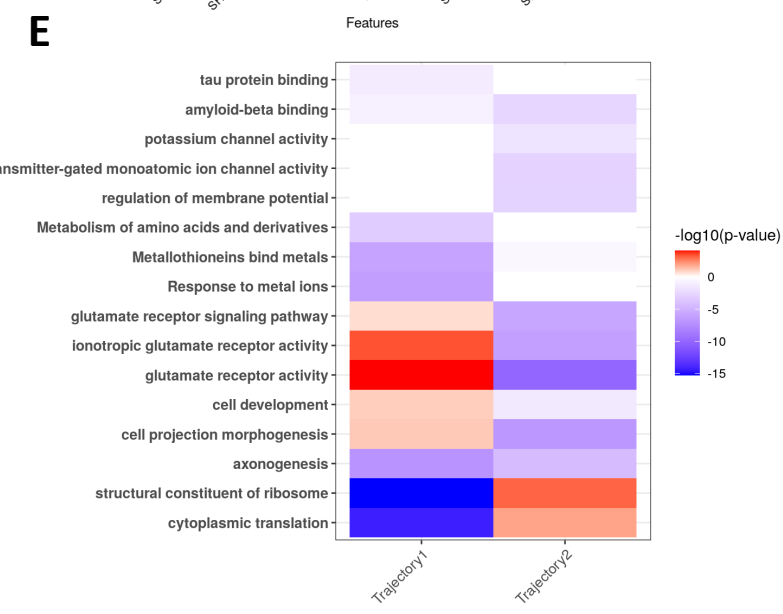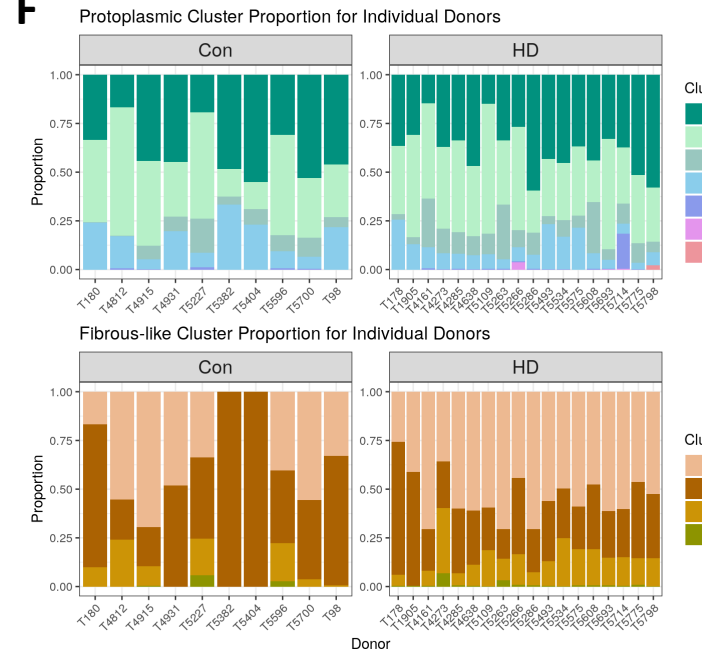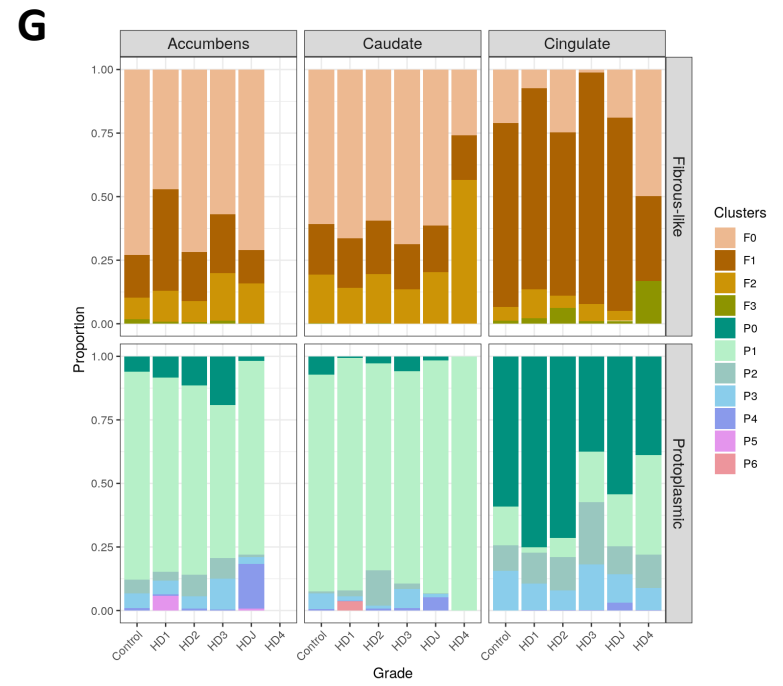

330 **Figure S6. Differential gene expression in astrocyte clusters.** **A)** Barplot depicting of  
331 the number of differential expressed genes increased (up) and decreased (down) in  
332 astrocyte sub-clusters comparing HD vs control. **B)** Heatmap showing GO, KEGG, and  
333 Reactome pathway enrichment analysis of the differentially expressed genes (DEGs)  
334 from (A) for each specified sub-cluster (columns). The colors indicate the  $-\log_{10}(\text{p-value})$   
335 of the enrichment score, with the red tiles showing terms enriched in DEGs increased in  
336 HD, and blue tiles showing terms enriched in DEGs decreased in HD. White tiles indicate  
337 no significance.



**A**

## Astrocyte Cluster DEG

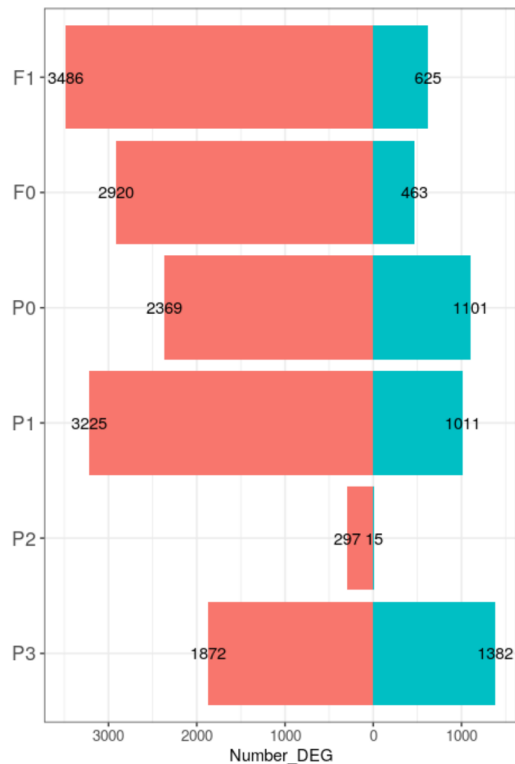**B**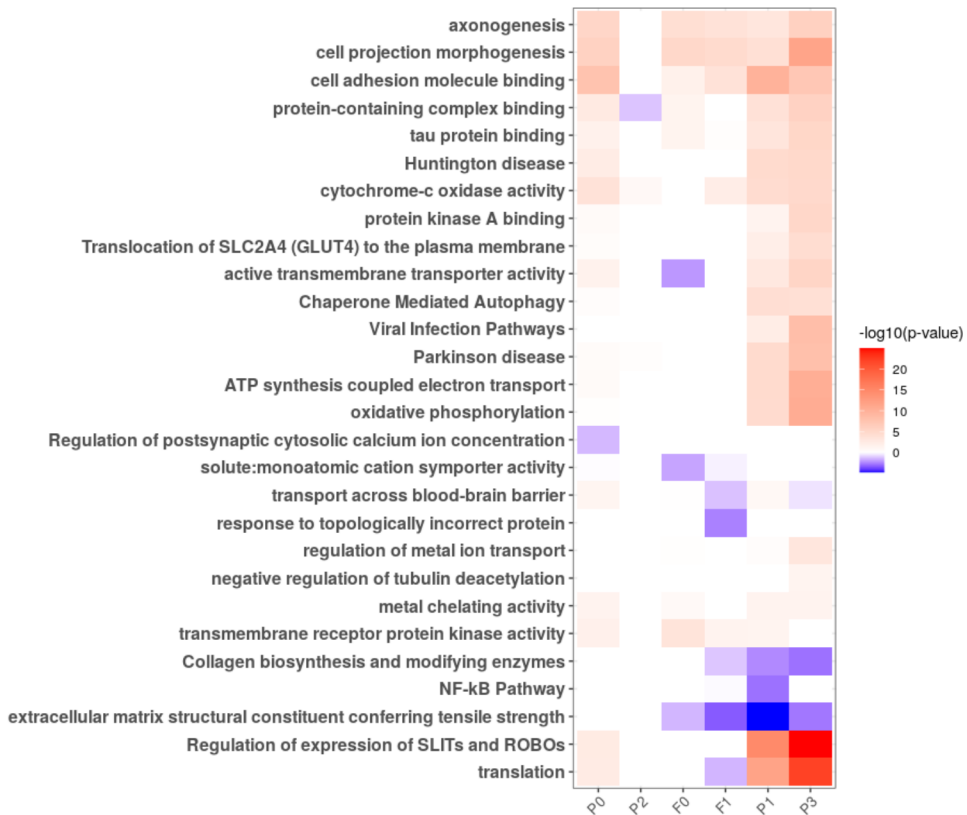

338 **Figure S7. Differential gene expression in HD neurons.** **A)** Volcano plots of  
339 differentially expressed genes (DEGs) from accumbens, red indicates DEGs increased  
340 in HD, and blue indicates DEGs decreased in HD samples. dSPN (direct-pathway spiny  
341 projection neurons) DEGs – left, GABAergic neurons middle panel (A'), and iSPN  
342 (indirect-pathway SPNs) right panel (A''). **B)** Same analysis as (A) but for caudate  
343 neurons. **C)** Same as A but for cingulate GABAergic neurons (left panel) and Glut  
344 (Glutamatergic) neurons right panel - C'. **D)** Bar plot displaying the number of DEGs  
345 increased (up) and decreased (down) in HD for the major neuronal type across the three  
346 brain regions analyzed. Only the top 1000 genes with absolute log foldchange > 0.5 and  
347 adjusted p-value < 0.05 were considered. **E)** Heatmap displaying the  $-\log_{10}(p\text{-value})$  of  
348 the GO terms (rows) enriched in DEGs comparing HD to control clusters (columns from  
349 A-C); red color indicates terms significantly enriched in DEGs increased in HD, and blue  
350 indicates terms significantly enriched in DEGs decreased in HD, and white means no  
351 significance. **F)** Representative images of immunohistochemical stain for LGR5 and  
352 (brown) with blue hematoxylin counter-stain to label nuclei in HD and control caudate  
353 nucleus tissue. Arrows indicate LGR5 positive neurons, while arrowheads depict indicate  
354 negative neurons. Scale bar = 50  $\mu\text{m}$ . The barplot below shows the quantification of the  
355 proportion of caudate neurons that were LGR5 positive in HD vs controls. Unpaired one-  
356 tailed t-test with N=5 for control and HD. Data is shown as mean +/- SEM. p value=  
357 0.0482.

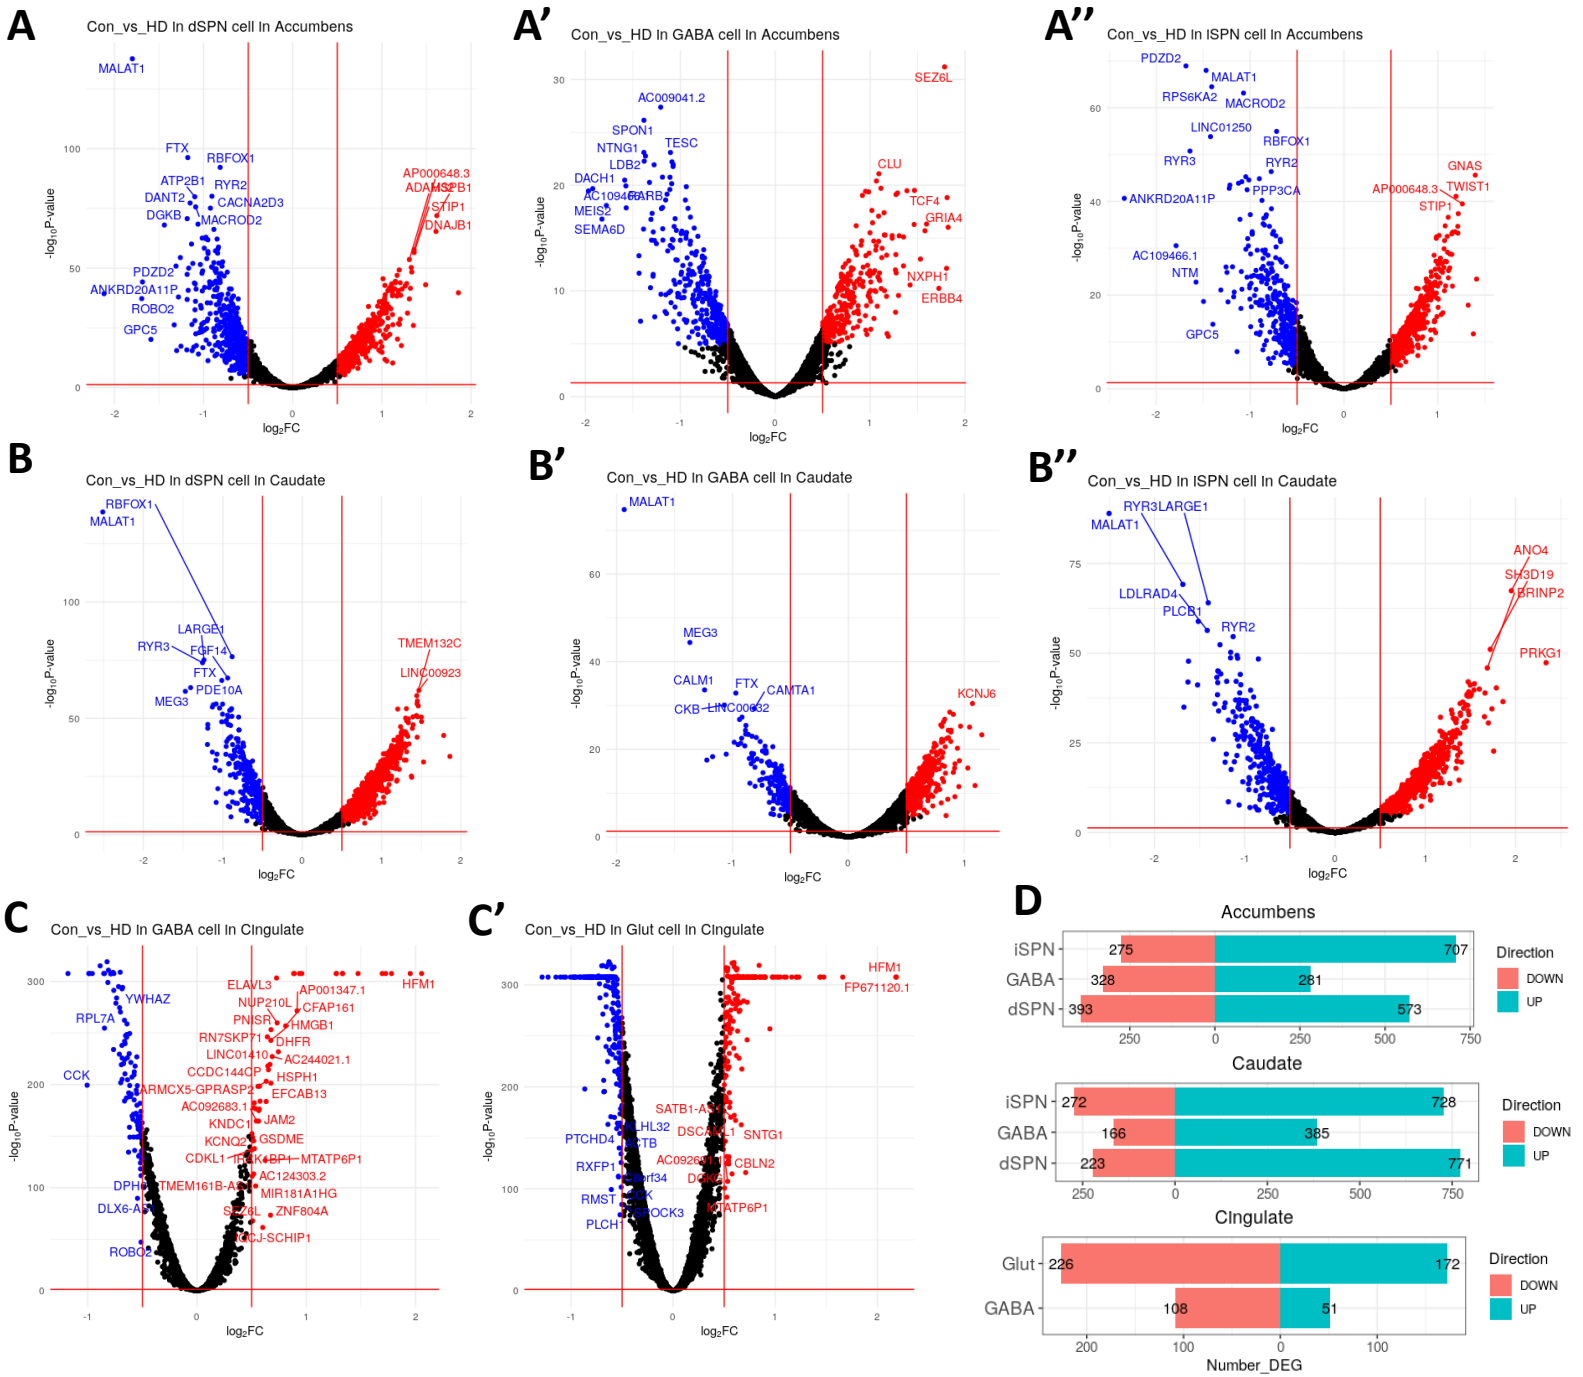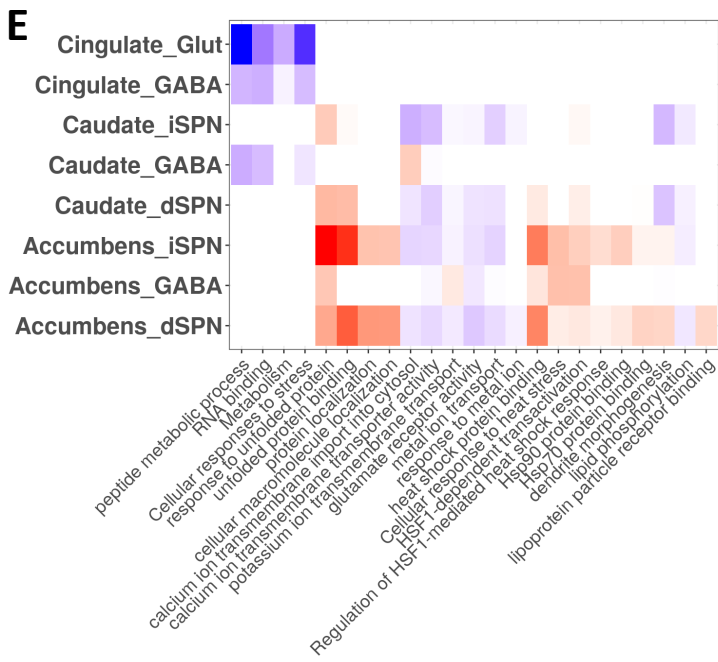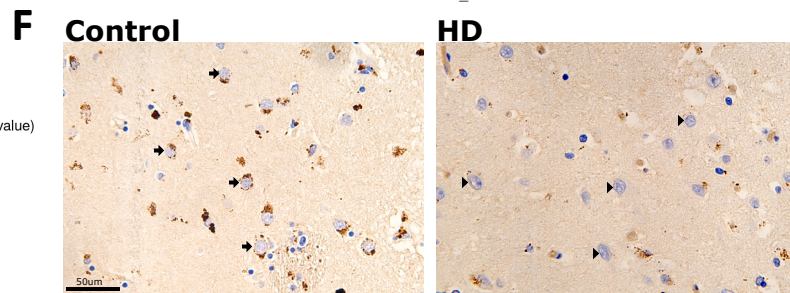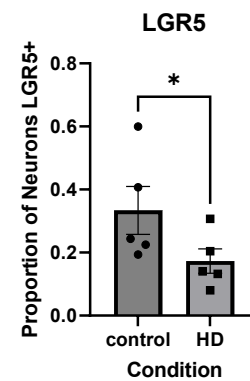



358 **Figure S8. Decreased CLU expression in cingulate HD astrocytes.** **A)** Representative  
359 multiplex immunofluorescence images of the cingulate cortex labeled for nuclei (DAPI-  
360 blue) and GFAP (green) to detect astrocytes (left), and CLU (red-middle). A merge of the  
361 three channels is shown on the right. Arrows indicate DAPI, GFAP and CLU positive cells  
362 (CLU positive astrocytes) and arrowheads indicate CLU negative astrocytes. Scale  
363 bar=20 $\mu$ m. **B)** Quantification of the percent of CLU positive astrocytes in the Cingulate.  
364 Unpaired two-tailed t-test with N=8 for control and 5 for HD. Data is shown as mean +/-  
365 SEM. P value= 0.0173. **C)** Same as A but for the caudate. **D)** Quantification of the percent  
366 of CLU positive astrocytes in the Caudate. Unpaired two-tailed t-test used with N=10 for  
367 control and 5 for HD. Data is shown as mean +/- SEM. P value= 0.6259.

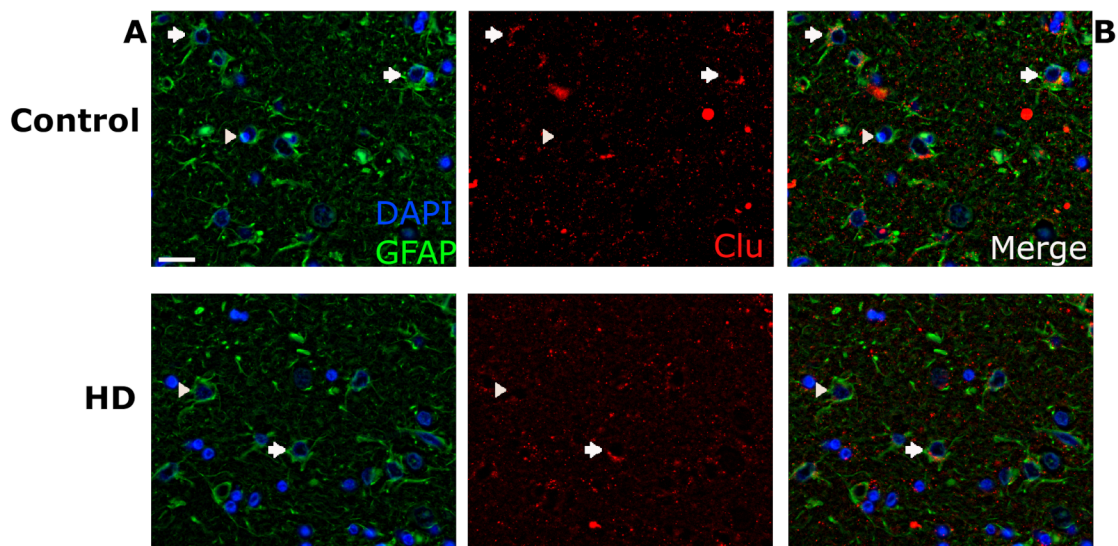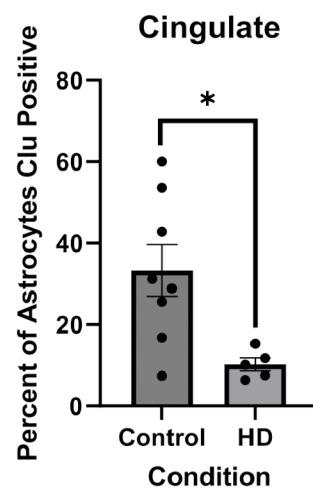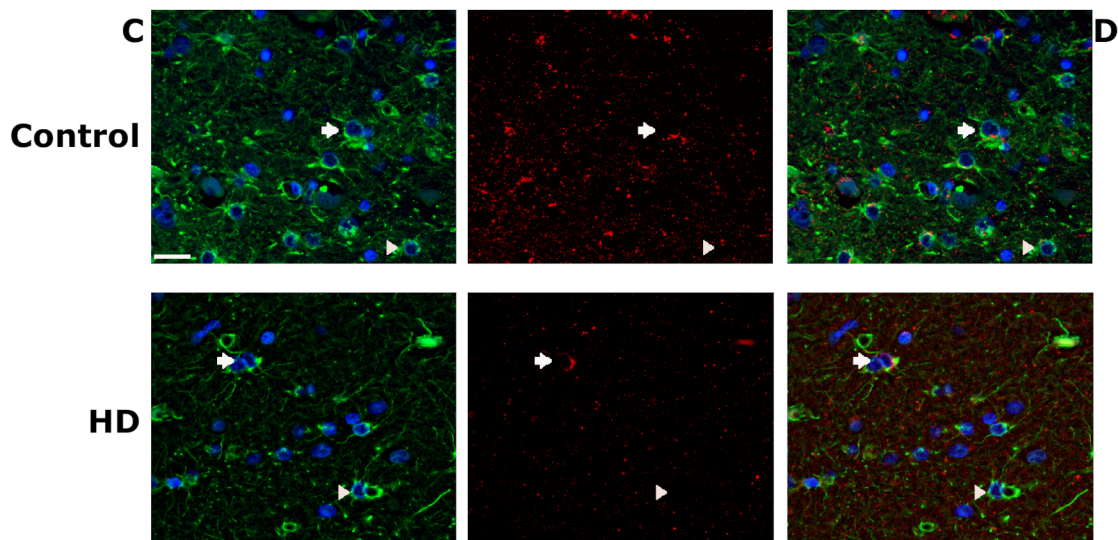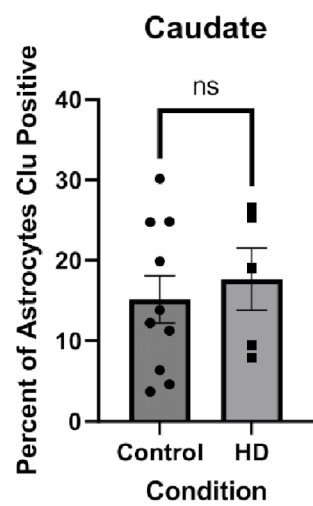

368 **Figure S9. Astrocyte gene expression in vitro and in sub-clusters. Related to figure**  
369 **7. A)** Gene expression quantification (real-time quantitative PCR) of MT3 and other  
370 metallothioneins in MT3 overexpressing versus GFP control astrocytes. The gene  
371 expression was normalized for GAPDH control. The delta-delta CT's were log-  
372 normalized. One sample t-test one-tailed test. P-value of 0.0125 for *MT3* and non-  
373 significant for other metallothioneins. **B-C)** Quantification of select MT family genes (B)  
374 and *CLU* (C) in *CLU* overexpressing astrocytes, The data is normalized and shown as  
375 per A. One sample two-tailed t-test, p-value= 0.1681 for *MT1E* and 0.2777 for *MT1A*, and  
376 p-value= 0.0016 for *CLU* in C. **D)** Real-time qPCR gene expression quantification of  
377 *SLC1A2* and *GLUL* in MT3 overexpressing astrocytes normalized by GAPDH and the  
378 delta-delta CT's were compared with a one-tailed one-sample t-test. MT3 overexpressing  
379 astrocytes significantly increased expression of *GLUL* (p=0.0352) and *SLC1A2*  
380 (p=0.0497). n = 3 biological replicates for A-D. **E-F)** Violin plots showing the normalized  
381 expression of *MT2A*, *MT3*, *MT1E*, and, *MT1G* for fibrous-like and protoplasmic astrocyte  
382 sub-clusters by region and condition. **G)** Top two panels show violin plots of *GLUL* and  
383 *SLC1A2* in protoplasmic astrocytes with high MT3 vs low MT3 (top panels). Cells with  
384 normalized MT3 expression > 2 were considered MT3-high. p-values are indicated - as  
385 calculated using a Wilcox test. Bottom two panels show dotplots of normalized expression  
386 of MT3 and *GLUL* (left) and *SLC1A2* (right), respectively. Line of best fit (blue) and p  
387 values as calculated using cor.test are indicated. See main text for correlation  
388 coefficients.

**A** MT Family Expression in MT3 Astrocytes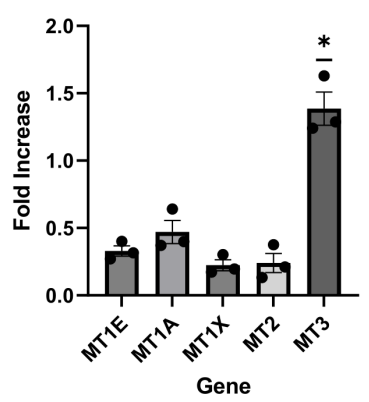**B** MT1A/E Expression in Clu Astrocytes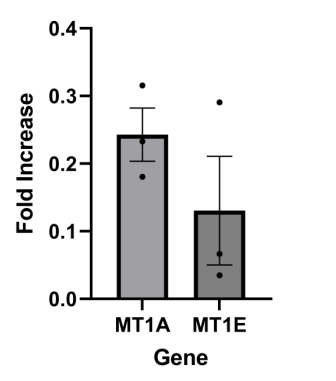**C** Clusterin Expression in Clu Astrocytes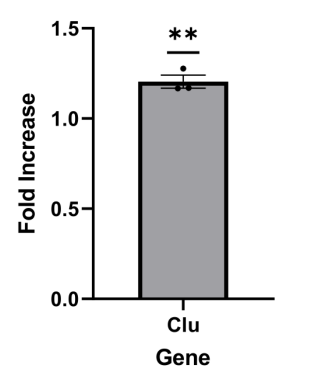**D** SLC1A2 and GLUL Expression in MT3 Astrocytes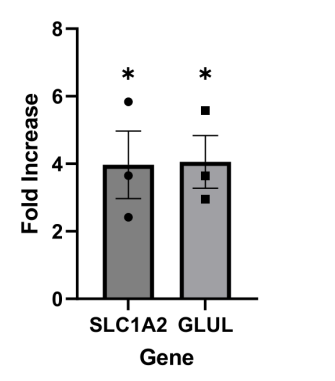**E** MT Gene Expression in Fibrous-like Cluster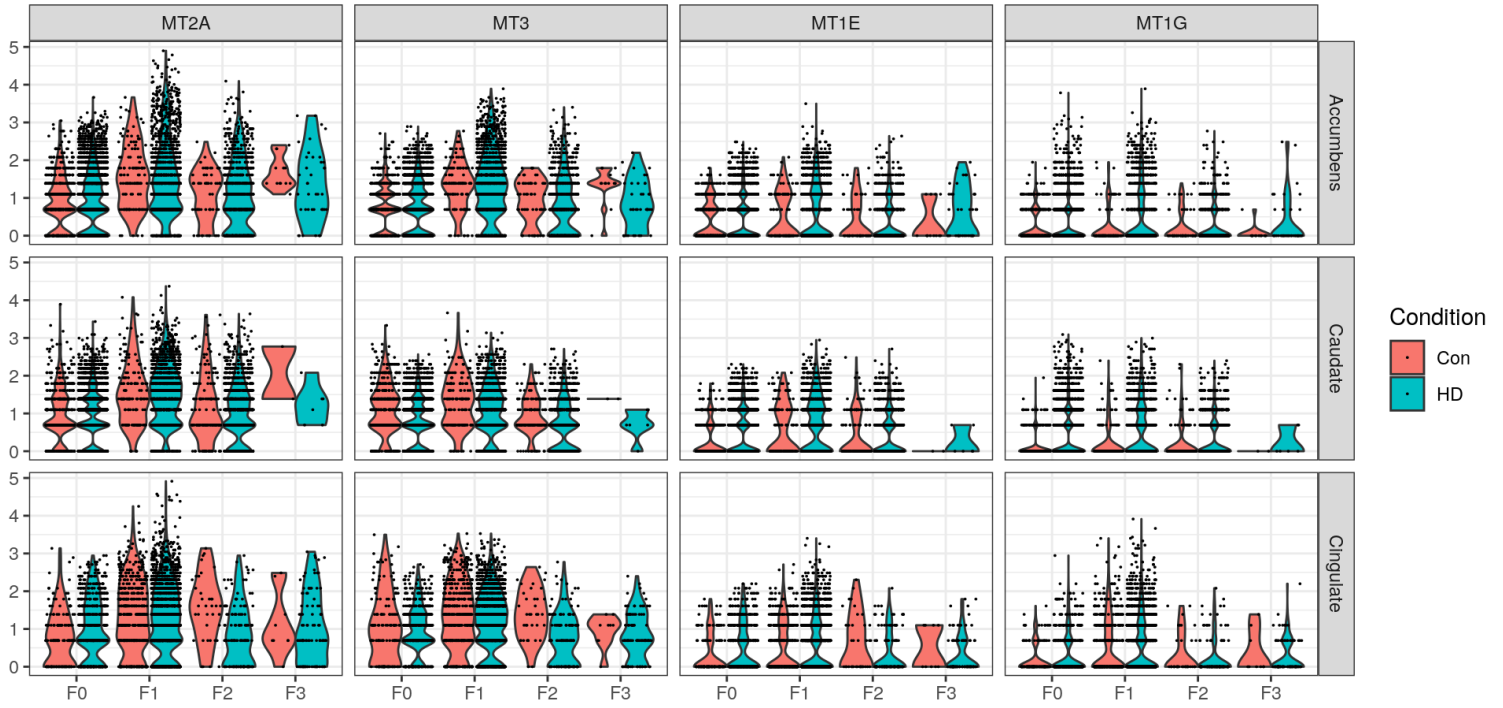**F** MT Gene Expression in Protoplasmic Cluster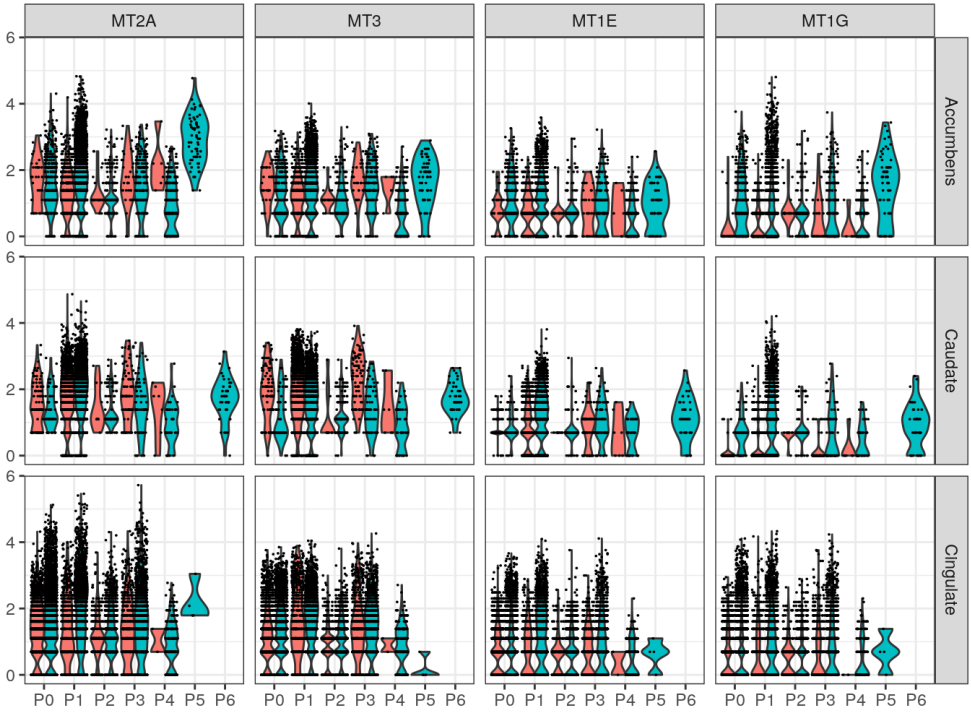**G** Protoplasmic Astrocyte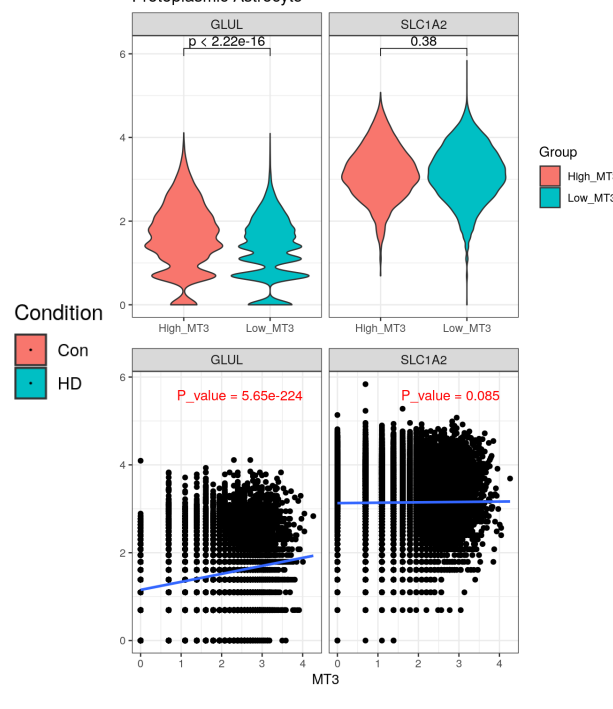

389 **Figure S10. snRNAseq of myeloid population in HD and control brains.** **A)** UMAP  
390 plot displaying the main myeloid lineages. Three cell types are indicated: microglia, T-  
391 cell, and monocytes. **B)** Dot plot showcasing markers for the three cell types. **C)** Volcano  
392 plot of genes that are differentially expressed in HD for microglia in the accumbens (red  
393 highlight = genes significantly higher in HD samples, blue highlight = genes significantly  
394 lower in HD samples). **D)** Same as (C) but for microglia in the cingulate. **E)** Same as (C)  
395 but for microglia in the caudate. **F)** Heatmap showing the  $\log_{10}(\text{p-value})$  of the GO terms  
396 enriched in the DEGs from (C), (D), and (E). The red tiles show terms enriched in DEGs  
397 increased in HD and blue tiles show terms enriched in DEGs decreased in HD. White tiles  
398 indicate no significance.

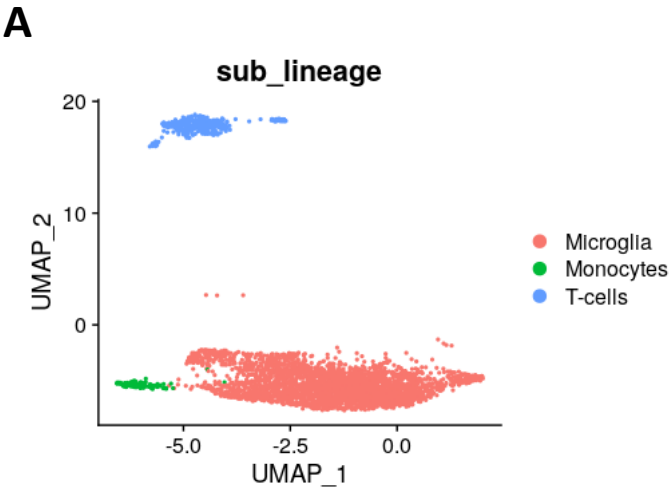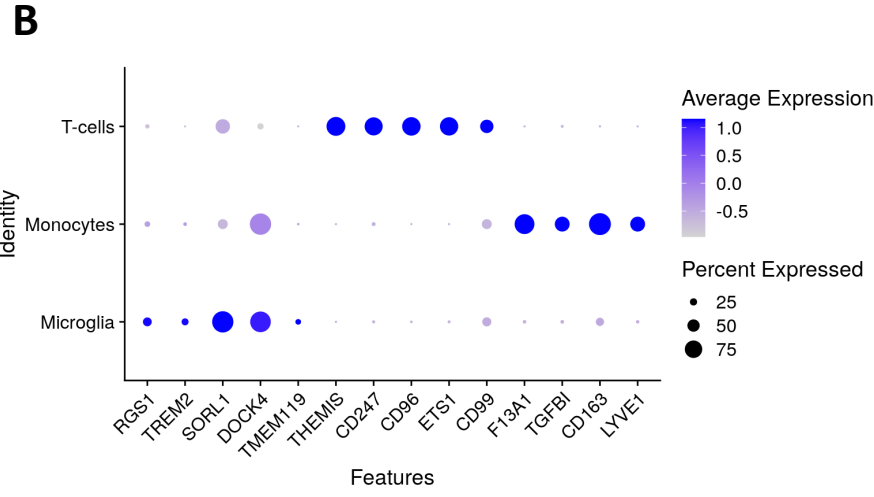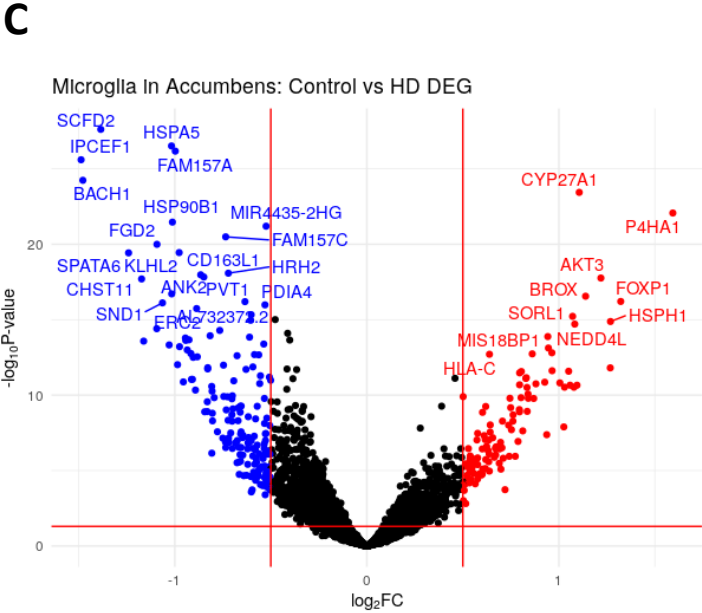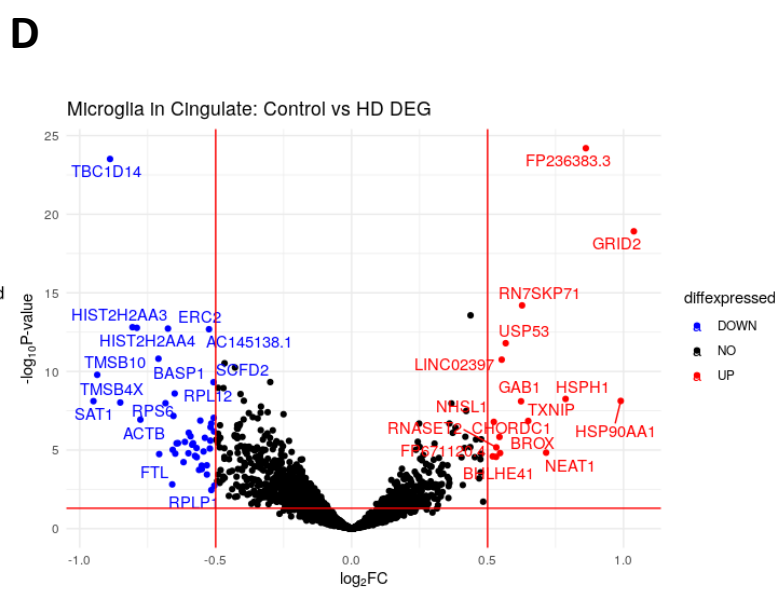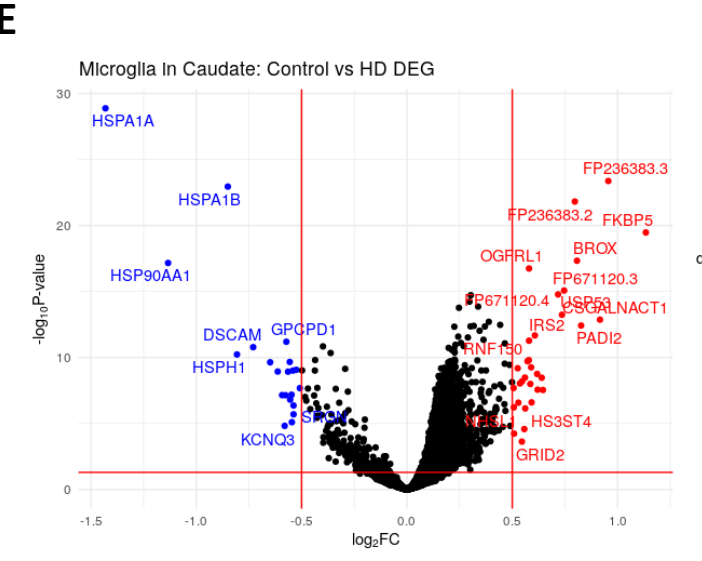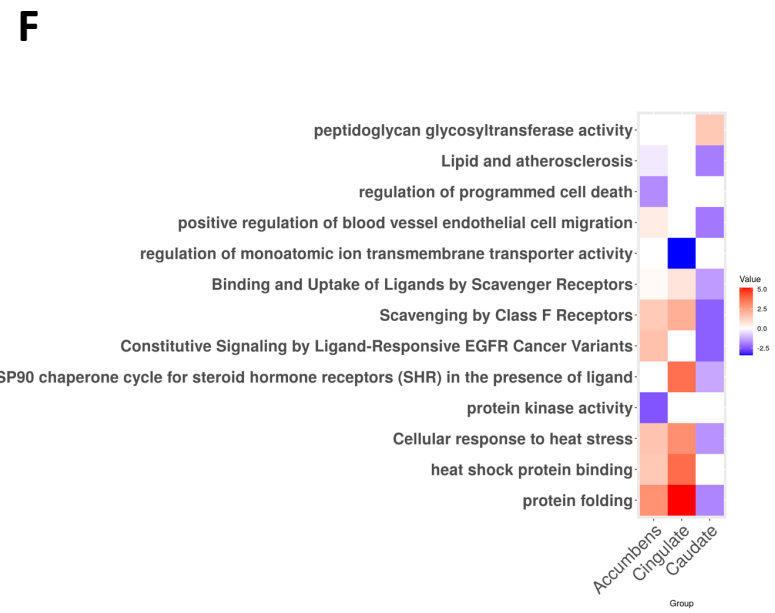

399 **Figure S11. MT3 astrocytes modulate microglial function.** **A)** Cartoon depicting the  
400 trans-well co-culture experiment between astrocytes and microglia (HMC3 cells). **B)** PCA  
401 plot of the first two component of the bulk-RNAseq samples: control samples are HMC3's  
402 co-cultured with GFP astrocytes or untransduced astrocytes. Experimental conditions are  
403 HMC3's co-cultured with CLU or MT3 overexpressing astrocytes. Mono-cultures of  
404 microglial cells are also shown. Note that co-culture is a major driver of gene expression  
405 variation. **C-D)** Volcano plots showing log-fold change of gene expression and adjusted  
406 p values when comparing control (HA/GFP = human astrocytes or GFP transduced  
407 astrocyte control group co-cultures) versus microglia co-cultured with CLU astrocytes (C)  
408 or MT3-overexpressing astrocytes. **E)** Heatmap showing the GO enrichment analysis of  
409 DEGs from D. The log<sub>10</sub>(p-value) of enrichment score is shown. Red tiles showing GO  
410 enriched in DEGs increased, and blue indicates GO terms enriched in DEGs decreased  
411 in HMC's co-cultured with MT3 astrocytes versus control astrocytes. **F)** Pre-ranked  
412 geneset enrichment analysis measuring the enrichment of DEG's from (D), CAG-  
413 correlated gene sets from Figure 1E, and the GO for phagocytosis, in the ranked DEG  
414 from Figure S10C-E and ranked cluster 0 markers (cluster 0 = microglial cluster from  
415 Figure S10A). The adjusted p values and normalized enrichment scores (NES) are  
416 indicated. Red stars indicate significance. **G)** Bar plot showing the percentage of microglia  
417 (HMC's) with phagocytosed GFP-labeled beads. The conditions indicated are: GFP =  
418 Microglia in co-culture with GFP astrocytes, CLU = Microglia in co-culture with CLU  
419 astrocytes, MT3 = Microglia in co-culture with MT3 astrocytes). N = 4 biological replicates.  
420 Paired two-tailed t-tests. The p values are indicated.

421 Panel A was created with BioRender.com released under a Creative Commons  
422 Attribution-NonCommercial-NoDerivs 4.0 International license.



**A**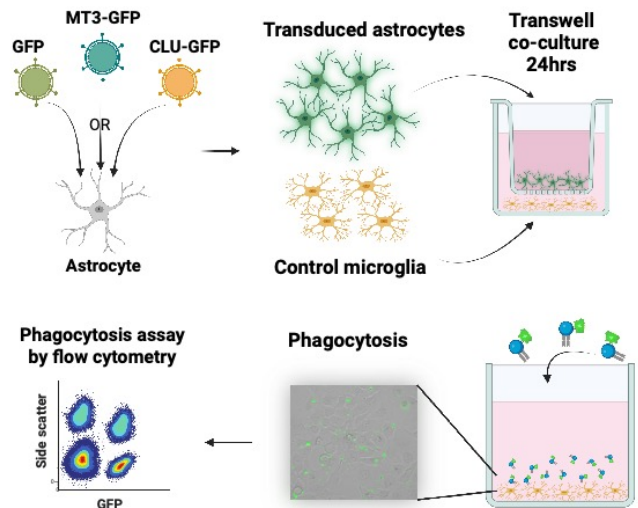**B**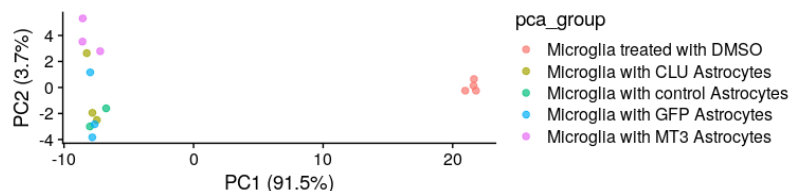**C**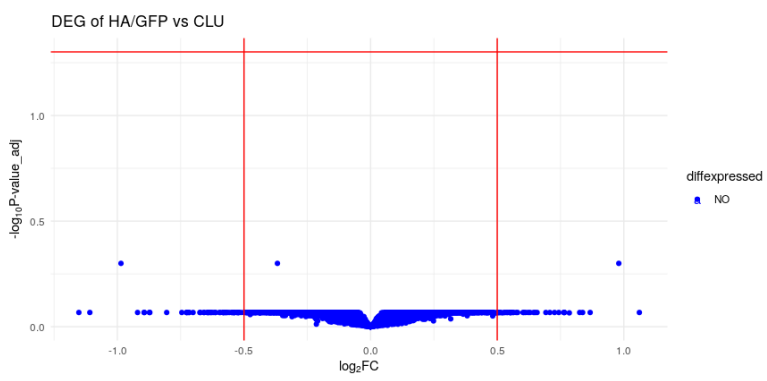**D**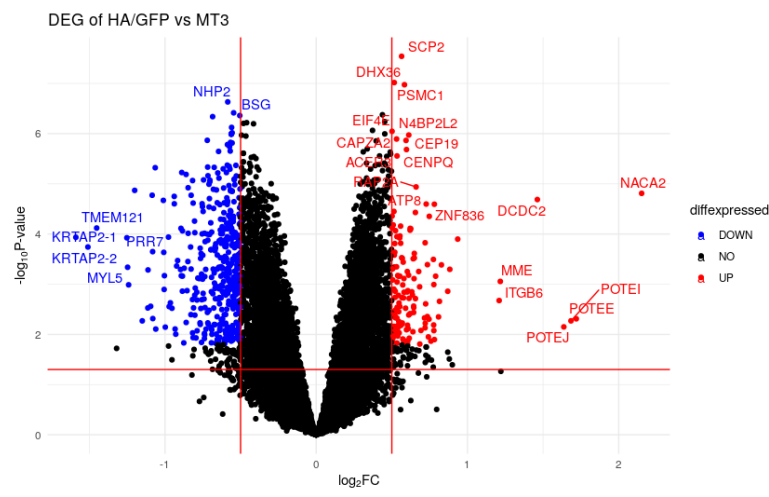**E**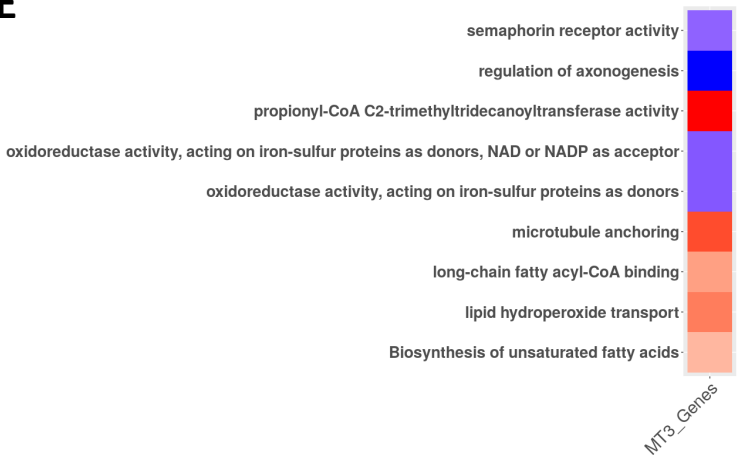**F**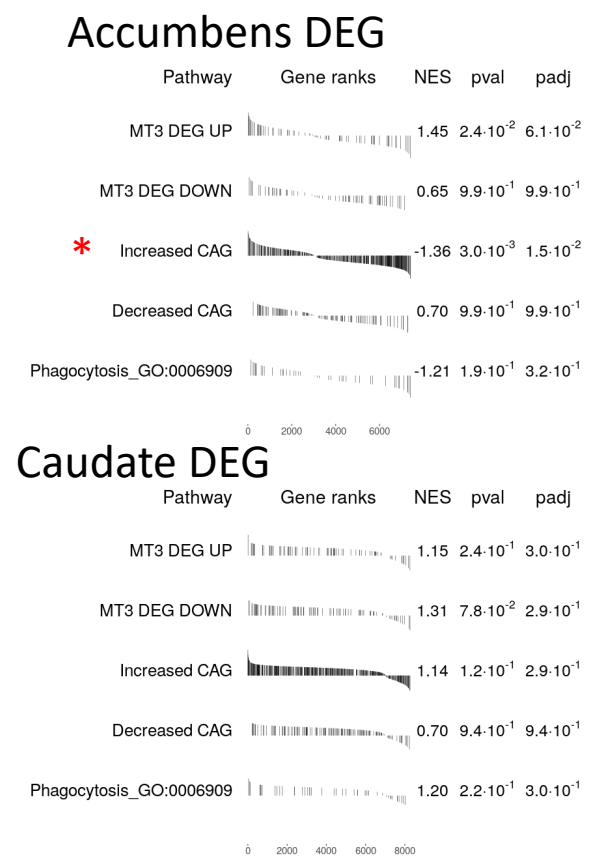**Cingulate DEG**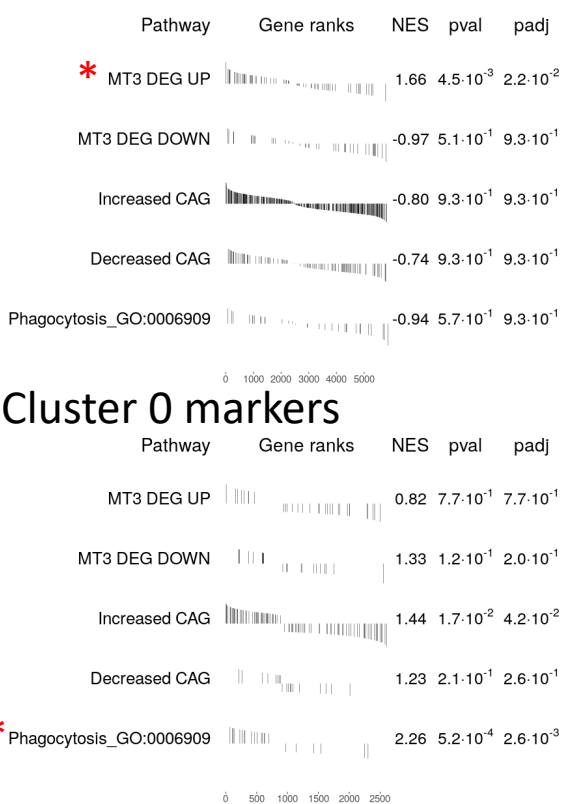**G**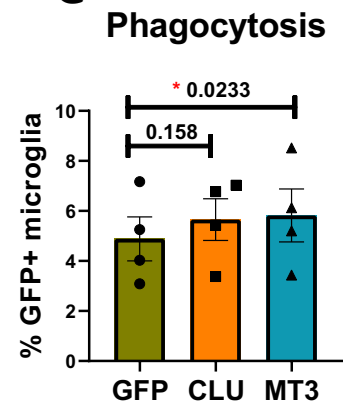



## Supplementary References

1. Runne, H. et al. Dysregulation of gene expression in primary neuron models of Huntington's disease shows that polyglutamine-related effects on the striatal transcriptome may not be dependent on brain circuitry. *The Journal of neuroscience : the official journal of the Society for Neuroscience* 28, 9723-9731 (2008).
2. Niccolini, F. et al. Altered PDE10A expression detectable early before symptomatic onset in Huntington's disease. *Brain* 138, 3016-3029 (2015).
3. Malaiya, S. et al. Single-Nucleus RNA-Seq Reveals Dysregulation of Striatal Cell Identity Due to Huntington's Disease Mutations. *The Journal of neuroscience : the official journal of the Society for Neuroscience* 41, 5534-5552 (2021).
4. Lee, H. et al. Cell Type-Specific Transcriptomics Reveals that Mutant Huntingtin Leads to Mitochondrial RNA Release and Neuronal Innate Immune Activation. *Neuron* (2020).
5. Matejuk, A. & Ransohoff, R.M. Crosstalk Between Astrocytes and Microglia: An Overview. *Front Immunol* 11, 1416 (2020).
6. Thrupp, N. et al. Single-Nucleus RNA-Seq Is Not Suitable for Detection of Microglial Activation Genes in Humans. *Cell reports* 32, 108189 (2020).
7. Taban, Q., Mumtaz, P.T., Masoodi, K.Z., Haq, E. & Ahmad, S.M. Scavenger receptors in host defense: from functional aspects to mode of action. *Cell Commun Signal* 20, 2 (2022).
8. Al-Dalahmah, O. et al. Re-convolving the compositional landscape of primary and recurrent glioblastoma reveals prognostic and targetable tissue states. *Nature communications* 14, 2586 (2023).
